1 **Finetuning ERK activity enables most somatic cells to reprogram into**  
2 **pluripotency**

3  
4

5 Qiao Wu<sup>1,2</sup>, Jian Zhang<sup>1,2</sup>, Xiao Hu<sup>1,2</sup>, Bruna Mafra de Faria<sup>1,2</sup>, Steven Maxwell Scalf<sup>1,2</sup>, Kutay  
6 Karatepe<sup>1,2</sup>, Ananda L Roy<sup>3</sup> and Shangqin Guo<sup>1,2,\*</sup>

7

8 *<sup>1</sup>Department of Cell Biology, Yale University, New Haven, CT, 06520, USA*

9 *<sup>2</sup>Yale Stem Cell Center, Yale University, New Haven, CT, 06520, USA*

10 *<sup>3</sup>National Institutes of Health, Laboratory of Molecular Biology and Immunology, Biomedical  
11 Research Center, National Institute on Aging, Baltimore, MD, USA*

12 *\*Correspondence should be addressed to S.G. Email: [shangqin.guo@yale.edu](mailto:shangqin.guo@yale.edu)*

13 *Address: 10 Amistad St. Room 131H, New Haven, CT 06520*

14 *Phone: 203-737-6411, fax: 203-785-4305*

15 **Abstract**

16

17 Somatic cell reprogramming is a stochastic process typically resulting in only a small fraction of  
18 cells successfully converting into induced pluripotent stem cells (iPSCs). The molecular and  
19 cellular basis underlying this stochasticity remains elusive. Here we demonstrate that this  
20 stochasticity can be largely eliminated when extracellular signal-regulated kinase (ERK) activity  
21 is tuned within a narrow range by using the MEK inhibitor at one tenth the concentration in the 2i  
22 media. Without pharmacologic inhibition, cells tune ERK activity by TFII- $\Delta$ , a multifunctional  
23 transcription factor that binds to and mediates ERK's nuclear activation. We find TFII- $\Delta$  to be an  
24 actin-binding protein. ERK activity is partially inhibited as TFII- $\Delta$  binds to actin which  
25 accumulates inside the nucleus of cells undergoing morphological remodeling. Manipulating  
26 actin's ability to accumulate inside the nucleus alters reprogramming amenability as well cell  
27 height. Actin-TFII- $\Delta$  drive cell height to go above the minimal height required for pluripotency  
28 (10  $\mu\text{m}$ ). This work uncovers a mechanistic couple between cell morphology and identity,  
29 providing convenient practices to massively increase reprogramming efficiency.

## 30 Introduction

31 Pluripotent stem cells (induced pluripotent stem cells, iPSC; embryonic stem cells, ESC) display  
32 stereotypic cell/colony morphology, informing the day-to-day quality assessment of the cultures.  
33 Naïve iPSC/ESC colonies display “dome-shaped” morphology, loss of which indicates exit from  
34 naïve pluripotency<sup>1,2</sup>. Even though cell morphology constitutes an integral aspect of a cell’s  
35 identity, it is unclear how morphology is molecularly coupled to enable specific identity.

36  
37 Cell morphology is largely determined by the actin cytoskeleton, dynamic proteinaceous  
38 structures consisted of monomeric G-actin and polymeric F-actin<sup>3,4</sup>. Actin dynamics is further  
39 modified by many actin binding proteins, such as nucleators, crosslinkers, branchers, as well as  
40 cross talkers with the other components of the cytoskeleton<sup>5-8</sup>. Actins, together with myosins,  
41 form molecular motors that convert chemical energy into mechanical energy. Therefore, the  
42 actomyosin system is central to transducing and interpreting the mechanical signals between  
43 the cell and its environment<sup>9-13</sup>. Actin is one of the most abundant cellular proteins, with the  
44 majority of the actin pool known to be present in the cytoplasm of most cell types<sup>14,15</sup>. The  
45 presence of a small pool of nuclear actin has been long considered an impurity or artifact until  
46 relatively recently<sup>16-26</sup>. Here, we report that mouse pluripotent stem cells allocate a significant  
47 portion (>50%) of their actin pool into the nucleus; allocating more actin into the nucleus  
48 facilitates cell morphological changes favoring pluripotency.

49  
50 TFII-I (encoded by *Gtf2i*) is a multifunctional transcription factor with several alternatively spliced  
51 isoforms involved in signal-induced gene regulation<sup>27-32</sup>. We discovered that the delta isoform of  
52 TFII-I (TFII-I $\Delta$ ), previously reported to undergo cytoplasmic and nucleus shuttling<sup>33</sup>, to be highly  
53 expressed in cells transitioning into pluripotency. Nuclear actin promotes reprogramming by  
54 binding to TFII-I $\Delta$ , thereby limiting ERK’s activation mediated by TFII-I $\Delta$ . Mimicking this mild  
55 ERK inhibition pharmacologically eliminates the stochasticity in Yamanaka reprogramming,  
56 resulting in the reactivation of pluripotency from most fibroblasts.

## 58 Results

### 59 More actin inside the nucleus favors pluripotency

60 In addition to being a major component of the cytoskeleton, actin dynamics participates in  
61 transducing mechanical signals, in large part by binding to and inhibiting the mechanosensitive  
62 transcriptional co-activator MKL1<sup>9,34-36</sup>. Together with its binding partner Serum Response  
63 Factor (SRF), MKL1 drives the expression of hundreds of genes involved in contractility and  
64 adhesion. A truncated MKL1 lacking the actin binding domains is constitutively active (caMKL1),  
65 which potently arrests somatic cell reprogramming into pluripotency<sup>37</sup>. The arrested  
66 reprogramming can be rescued by genetic or pharmacologic inhibitors of actomyosin  
67 contractility. In addition to the rescuers reported in Hu et al.<sup>37</sup>, we found that shRNAs targeting  
68 *Xpo6*, the exportin for nuclear actin, similarly rescued the caMKL1-blocked cells into  
69 pluripotency (Fig. S1a-c). These results suggest that failure to activate pluripotency could be  
70 related to insufficient actin in the nucleus. Consistent with this interpretation, a significant portion  
71 of the actin pool is found in the nucleus of ESC and iPSC (Fig. 1a). Furthermore, more actin  
72 becomes allocated into the nucleus during somatic cell reprogramming into pluripotency, with  
73 the somatic (hematopoietic) cells displaying predominantly cytoplasmic actin (Fig. 1b, Fig. S1d).

74  
75 To test whether allocating more actin into the nucleus promotes somatic cell reprogramming into  
76 pluripotency, we transduced Mouse Embryonic Fibroblasts (MEFs) derived from doxycycline  
77 (Dox) inducible Oct4/Klf4/Sox2/Myc (OKSM) mice expressing the Oct4:GFP reporter  
78 (R26<sup>rtTA</sup>;Col1a1<sup>4F2A</sup>;Oct4<sup>GFP</sup>)<sup>38,39</sup>, with a retroviral construct encoding  $\beta$ -actin, tagged on the N-  
79 terminus with a nuclear localization signal (NLS) and FLAG epitope (Fig. 1c). Empty vector (EV)

80 or wild type (WT)  $\beta$ -actin were used as controls. The presence of exogenously expressed actin  
81 was confirmed by immunofluorescence (IF) against FLAG (Fig. 1d). In cells expressing the WT  
82  $\beta$ -actin, most FLAG signals localized to the cytoplasm, confirming actin's predominant  
83 cytoplasmic localization. In contrast, FLAG signal was enriched in the nucleus of cells  
84 expressing NLS-actin. The nuclear FLAG signals appeared as elaborate networks (Fig. 1d,  
85 Movie S1), suggesting that the NLS-actin is involved in F:G (filamentous and globular actin),  
86 dynamics and crosslinking/branching with the endogenous actin. Of note, cytoplasmic FLAG  
87 signals were also detected in cells expressing NLS-actin, likely reflecting actin's strong tendency  
88 toward cytoplasmic localization despite the NLS, with a key determining factor becoming clear  
89 later in this study. The overexpression level is mild, estimated to be ~1% of the endogenous  
90 actin (Fig. 1e, S1e). Reprogrammable MEF expressing these constructs were treated with Dox  
91 to induce OKSM. Strikingly, the number of alkaline phosphatase positive (AP+) or Oct4:GFP  
92 positive colonies were greatly increased by NLS-actin expression, while no difference was  
93 shown by cells expressing WT  $\beta$ -actin (Fig. 1f-h). To determine whether F:G dynamics is  
94 required for NLS-actin to promote reprogramming, we expressed point mutants NLS-actin<sup>G13R</sup>  
95 and NLS-actin<sup>S14C</sup>, defective in polymerization or depolymerization, respectively<sup>40</sup> (Fig. 1f-h,  
96 S1f, Movies S2,3). Neither mutants increased the number of AP+ or Oct4:GFP+ colonies.  
97 Therefore, concentrating F:G competent actin inside the nucleus promotes pluripotency  
98 induction from mammalian somatic cells, contrasting the findings in frog oocytes in which  
99 polymerized nuclear actin was more functional<sup>41</sup>.

100

101 Besides the increased numbers of AP+ and Oct4:GFP+ colonies, the colonies arising from NLS-  
102 actin expressing cells had sharp borders and were light reflective, displaying typical dome  
103 shaped morphology on day 15 (Fig. 1i). In contrast, many of the colonies in EV control  
104 reprogramming cultures had Oct4:GFP+ cells diffused/mixed within flatter colonies. Further,  
105 Oct4:GFP was brighter when NLS-actin was expressed, as determined by flow cytometry (Fig.  
106 1j-l). Over time, the Oct4:GFP+ cells from EV cultures matured and acquired an intensity similar  
107 to those expressing NLS-actin, while the %Oct4:GFP+ in the latter expanded. Lastly, NLS-actin  
108 promoted reprogramming is not limited to MEFs, as NLS-actin similarly promoted  
109 reprogramming of hematopoietic cells (Fig. S1g-i). Taken together, NLS-actin promotes  
110 pluripotency induction from somatic cells by Yamanaka factors.

111

### 112 **NLS-actin promotes somatic cell reprogramming defying known mechanisms**

113 To understand how NLS-actin facilitates pluripotency activation, we began by comparing the  
114 transcriptomes of MEFs expressing NLS-actin, WT  $\beta$ -actin and EV (Fig. 2a,b, Table S1). In the  
115 absence of Yamanaka factor expression (Vehicle), neither actin constructs caused substantial  
116 transcriptomic changes. 4 days of Yamanaka factor expression (Dox) led to changes in  
117 thousands of genes irrespective of the co-expressed actin constructs (Fig. 2b), as expected. We  
118 therefore focused on the transcriptomic differences in reprogramming cells co-expressing either  
119 actin constructs, or as compared to EV controls. WT  $\beta$ -actin and NLS-actin similarly reduced  
120 SRF target genes as assessed by Gene Set Enrichment Analysis (GSEA)<sup>42,43</sup> (Fig. 2c,d, S2a),  
121 confirming actin's known effects in inhibiting MKL1/SRF. Despite their similar inhibition of SRF  
122 targets, GSEA revealed that NLS-actin expressing cells more resemble pre-iPSCs, as defined  
123 by Polo et al.<sup>44</sup> relative to those expressing WT  $\beta$ -actin (Fig. 2e). Since many SRF targets are  
124 typical mesenchymal genes, the similar inhibition of SRF targets by both actin constructs argues  
125 against the notion that antagonizing mesenchymal identity is how NLS-actin promotes  
126 reprogramming (Table S1). Gene Ontology (GO) analysis of the 158 up- and 300 down-  
127 regulated (differentially expressed genes) DEGs (Fig. 2b) between the actin constructs only  
128 enriched for "structural constituent of ribosome", "pre-mRNA intronic binding" and cadherin

129 based adhesion (Table S2), yielding little insights into the mechanism how NLS-actin promotes  
130 pluripotency.

131  
132 Even after 8 days of factor induction, when increased H3K4me3 marks at pluripotency genes  
133 became prominent in NLS-actin expressing cells (Fig. S2b,c), cells expressing different  
134 constructs displayed no difference in cell cycle, bulk transcriptional activity or DNA damage (Fig.  
135 S2d-f), all processes in which nuclear actin have been reported to function<sup>19,45-53</sup>. As cell  
136 extrinsic signals such as secreted factors in the medium could influence reprogramming<sup>54</sup>, we  
137 next compared cells within the same culture using mCherry fluorescence to distinguish cells  
138 with or without NLS-actin (Fig. 2f-j). At day 10 when Oct4:GFP+ cells began to emerge (0.55%  
139 Oct4:GFP+), the mCherry+ cells were enriched for iPSC genes as compared to the mCherry-  
140 cells from the same culture (Fig. 2g,h). Robust Oct4:GFP+ cells (38.8%) emerged on day 14, of  
141 which about 25.1% were mCherry- (Fig. 2i). On day 14, among the Oct4:GFP- population, the  
142 mCherry+ cells were still enriched for iPSC genes as compared to the mCherry- counterparts  
143 (Fig. 2j, left). In contrast, day 14 Oct4:GFP+/mCherry+ cells were less similar to iPSCs as  
144 compared to the Oct4:GFP+/mCherry- cells, consistent with the latter being mature iPSCs that  
145 have silenced the retroviral construct (Fig. 2j, right). When all cell states throughout the  
146 reprogramming time course were compared by CellNet analysis<sup>55</sup> (Fig. 2k, S2g), it confirmed  
147 that reprogramming was initiated from fibroblasts, went through intermediate states and ended  
148 with a cell state highly similar to ESC. However, CellNet analysis could not even detect a more  
149 advanced cell state toward pluripotency at day 10 in NLS-actin expressing cells (Fig. 2k, S2g),  
150 Therefore, NLS-actin's surprising pro-reprogramming effect remains difficult to explain through  
151 its known modes of action.

152

### 153 **Gtf2i/TFII-I is required for NLS-actin to promote reprogramming**

154 To understand how nuclear actin promotes somatic cell reprogramming, we determined the  
155 nuclear actin interactome in the reprogramming intermediates by co-immunoprecipitation (Co-  
156 IP) with FLAG antibody followed by mass spectrometry (Fig. S3a). Silver stain of the nuclear  
157 protein precipitates from WT  $\beta$ -actin and NLS-actin expressing cells detected two prominent  
158 bands of 42 KD and 250 KD, corresponding to actin and Myh9/10, respectively, and confirmed  
159 by protein-specific antibodies (Fig. 3a,b). Other abundant nuclear proteins such as histone H3  
160 was not enriched, confirming the specificity of our approach. A total of 122 proteins with at least  
161 2 unique peptides in the WT  $\beta$ -actin or NLS-actin samples were recovered (Table S3). These  
162 122 candidates include 38 known actin-binding proteins, 76 known RNA binding proteins and 22  
163 known DNA binding proteins (Fig. 3c). The large number of known DNA/RNA binding proteins is  
164 consistent with their nuclear enriched expression. We envisioned that this nuclear actin  
165 interactome contain mediators for NLS-actin's pro-reprogramming function.

166

167 We next constructed a custom guide RNA (gRNA) library to pinpoint the candidate(s) that  
168 mediate NLS-actin's pro-reprogramming function. If a specific gene is required for NLS-actin to  
169 promote reprogramming, NLS-actin+ cells expressing gRNAs targeting that gene should not  
170 reprogram, resulting in depletion of such gRNAs relative to the other gRNAs in the library,  
171 quantifiable by sequencing. This nuclear actin interactor targeting (NAIT) library contains 528  
172 gRNAs against the 122 candidates plus 10 additional control genes, with 4 gRNAs per gene  
173 (Table S4). The pooled sgRNA library, co-expressing blue fluorescence protein (BFP), was  
174 transduced into Cas9 expressing reprogrammable MEFs (Fig. 3d). BFP+ cells were then  
175 transduced with NLS-actin/mCherry and genomic DNA was harvest as input DNA. After Dox  
176 induction, mCherry+ and mCherry- cells were sorted to provide at least 150x coverage,  
177 sufficient to detect these reprogramming cells which had an efficiency of ~7.5% (Fig. 1h). The  
178 abundance of individual gRNAs in the mCherry+/- cells was quantified by sequencing starting at

179 day 4 and compared against the input DNA<sup>56,57</sup>. This analysis revealed that multiple gRNAs  
180 targeting *Gtf2i* (encoding TFII-I) were the most depleted in the NLS-actin expressing cells (Fig.  
181 3e, S3b,c, Table S4). We validated that TFII-I protein is indeed precipitated by NLS-actin (Fig.  
182 S3d), and IF detected prominent TFII-I signal on the fibrous nuclear actin network (Fig. S3e,f).

183  
184 To independently validate the functional importance of *Gtf2i* in mediating NLS-actin's pro-  
185 reprogramming effect, we designed three shRNAs against *Gtf2i* and confirmed their knockdown  
186 in reprogrammable MEF (Fig. 3f). Of note, *Gtf2i* was previously identified in a genome wide  
187 screen as a reprogramming barrier during the transitional stage<sup>58</sup>. In the non NLS-actin  
188 expressing cells, *Gtf2i* shRNAs increased colony numbers by ~2 fold (Fig. 3g), similar to the  
189 report by Yang et al.<sup>58</sup>. In comparison, NLS-actin caused increase in colony numbers was more  
190 pronounced (Fig. 3g, S3g,h). Importantly, NLS-actin-mediated increase in colony numbers was  
191 abolished by the *Gtf2i* shRNAs. The effects could be seen with all three individual *Gtf2i* shRNAs  
192 (Fig. 3g, S3g,h). In subsequent experiments, these shRNAs were pooled which yielded similar  
193 knockdown efficiency (Fig. 3h). Consistent with the increase in Oct4:GFP+ colony numbers,  
194 *Gtf2i* targeting shRNAs led to brighter Oct4:GFP in EV control cells (Fig. 3i-l). Strikingly, no  
195 Oct4:GFP+ colonies were present in NLS-actin expressing cells with *Gtf2i* knockdown (KD).  
196 Further, such colonies appeared spread or flat (Fig. 3i, bottom right). Thus, NLS-actin depends  
197 on *Gtf2i*/TFII-I to promote reprogramming.

#### 198 199 **The delta isoform of TFII-I, TFII-I $\Delta$ , mediates NLS-actin's pro-reprogramming effect**

200 TFII-I is highly conserved between human and mouse and has several alternatively spliced  
201 isoforms<sup>59,60</sup>. Two of the abundant isoforms,  $\Delta$  and  $\beta$ , are detected in most cell types, including  
202 fibroblasts (Fig. 4a). Of note, *Gtf2i* mRNA reads mapping to this alternative region were  
203 abundant during reprogramming (Fig. 4a, boxed region). As this region is involved in generating  
204 the  $\Delta$  and  $\beta$  isoforms, these results suggest that TFII-I isoforms could be differentially expressed  
205 during reprogramming, even though the mRNA reads of the entire *Gtf2i* gene remains similar  
206 (Fig. S4a). To better resolve the expression of these isoforms, we designed primers that span  
207 the alternatively utilized exons (Fig. 4a, black arrows). The transcripts detected by these primers  
208 decreased in the reprogramming intermediates, while the relative portion of  $\Delta$  increased (Fig.  
209 4b,c). Together, these results suggest that specific *Gtf2i* isoform, the  $\Delta$  isoform, might be the  
210 relevant one in mediating NLS-actin promoted pluripotency activation. Indeed, a larger TFII-I  
211 protein band dominated in MEF, while iPSC expressed a faster-migrating species, consistent  
212 with their expression of the  $\beta$  and  $\Delta$  isoforms, respectively (Fig. 4d)<sup>33</sup>. Lastly, the expression of  
213 these isoforms in mature iPSC and ESC is sensitive to cell plating density (Fig. 4e): the  $\Delta$   
214 isoform dominates at high density, while  $\beta$  becomes more abundant at low density (Fig. 4e).  
215 These results echo our previous findings that higher cell density favors pluripotency<sup>54</sup>.

216 Together, these results suggest  $\Delta$ -specific biology during reprogramming.

217  
218 To further test the isoform-specific roles, we designed two additional shRNAs targeting *exon 12*  
219 (Fig. 4a, orange bars), which is absent in *Gtf2i $\Delta$* , while the shRNAs shown earlier (Fig. 3f-k,  
220 S3g,h) targeted both  $\Delta$  and  $\beta$  isoforms (Fig. 4a, three black bars) and will be referred to as the  
221  $\Delta/\beta$  dual targeting shRNAs from here on. Indeed, either  $\beta$ -specific or  $\Delta/\beta$  dual targeting shRNAs  
222 efficiently reduced TFII-I protein in the initial MEF, which predominantly express the larger  $\beta$   
223 isoform (Fig. 4f, S4b). In contrast, only the  $\Delta/\beta$  dual targeting shRNAs reduced the protein in  
224 later reprogramming cells (day 12), which expressed the smaller  $\Delta$  isoform (Fig. 4f, Fig. S4b).  
225 Importantly, the  $\beta$ -specific shRNAs did not change the number of AP+ or Oct4:GFP+ colonies in  
226 NLS-actin expressing cells, contrasting the situation with  $\Delta/\beta$  dual targeting shRNAs (Fig. S4c-e,  
227 compare to Fig. 3f-l and Fig. S3g,h). Consistent with the unchanged colony numbers,  $\beta$ -specific  
228 shRNAs did not affect NLS-actin promoted Oct4:GFP intensity (Fig. 4g-j). These results further

229 support that TFII- $\Delta$  is the relevant isoform under our experimental conditions. From here on, we  
230 focused on how TFII- $\Delta$  functions in reprogramming.

231

### 232 **Inhibiting TFII- $\Delta$ while co-expressing NLS-actin reduces pERK to a level not permissive** 233 **for reprogramming**

234 Next, we co-expressed TFII- $\Delta$  directly with or without NLS-actin in reprogramming MEFs (Fig.  
235 5a-c). Consistent with its role in mediating NLS-actin's effect, TFII- $\Delta$  co-expression potentiated  
236 NLS-actin promoted reprogramming. Remarkably, a tyrosine to phenylalanine point mutant TFII-  
237  $\Delta^{Y248F}$  abolished this potentiation effect. Since this TFII- $\Delta^{Y248F}$  mutant was reported to be  
238 defective in binding ERK<sup>30</sup>, we examined pERK binding to TFII- $\Delta$  in the reprogramming  
239 intermediates by co-IP. Indeed, pERK binding to TFII- $\Delta^{Y248F}$  was significantly reduced as  
240 compared to WT TFII- $\Delta$ , particularly in NLS-actin expressing cells (Fig. 5d). These results  
241 suggest that effect of NLS-actin-TFII- $\Delta$  on reprogramming could be mediated through  
242 regulating ERK activity.

243

244 TFII- $\Delta$  is an atypical transcription factor in that it can shuttle between the cytoplasm and the  
245 nucleus. When TFII- $\Delta$  translocates into the nucleus upon growth-factor signaling, it imports  
246 pERK leading to the activation of ERK target genes such as *c-fos*<sup>33</sup>. Given ERK's well  
247 established function in regulating pluripotency<sup>61-68</sup>, and iPSC have low pERK (Fig. 5e), we  
248 examined whether ERK activity is affected by NLS-actin and/or TFII- $\Delta$ . As indicated by the live  
249 cell ERK-KTR reporter<sup>69,70</sup>, NLS-actin expression dampened serum stimulated ERK activation  
250 (Fig. 5f). Specifically, ERK remained active at least 40 minutes after serum stimulation in EV  
251 control cells; in contrast, ERK became inactivated in NLS-actin expressing cells as soon as  
252 serum was washed out. We next examined the endogenous ERK activity in reprogramming  
253 MEFs by western blotting for pERK. Consistent with the results by the ERK-KTR reporter, pERK  
254 level was reduced in NLS-actin expressing cells (Fig. 5g,h). Furthermore,  $\Delta/\beta$  dual targeting  
255 shRNAs also reduced pERK levels, consistent with its reported role in mediating pERK's  
256 nuclear activation<sup>33</sup>. Thus, either NLS-actin expression or  $\Delta/\beta$  dual targeting shRNAs each  
257 reduced ERK activity and promoted reprogramming. However, while the lowest pERK level  
258 occurs with simultaneous NLS-actin expression and  $\Delta/\beta$  KD, such a condition became  
259 incompatible with reprogramming (Fig. 5g-h, also refer to Fig. 4g-j, 3f-k). We interpreted these  
260 results to mean that even though lowering ERK activity favors pluripotency, pluripotency may  
261 need to arise within a narrow range of ERK activity; lowering it further beyond this range would  
262 again inhibit reprogramming. Such an interpretation is consistent with a model where the TFII- $\Delta$   
263 pool for activating ERK is constrained by binding to actin. We tested this possibility by  
264 fluorescence recovery after photobleaching (FRAP) using TFII- $\Delta$ -GFP fusion protein. This  
265 confirmed that NLS-actin indeed rendered TFII- $\Delta$ -GFP slower to recover after photobleaching  
266 (Fig. S5a). Taken together, TFII- $\Delta$  tunes ERK activity to promote reprogramming, a process  
267 that became unmasked by NLS-actin expression; as the TFII- $\Delta$  pool bound to actin becomes  
268 compromised for ERK activation, further reducing TFII- $\Delta$  by sgRNAs or shRNAs abolishes  
269 reprogramming.

270

### 271 **Mild ERK inhibition by chemical inhibitors promotes reprogramming from most** 272 **fibroblasts**

273 The ERK tuning model predicts that pluripotency would be effectively induced if ERK activity is  
274 tuned pharmacologically. We therefore treated reprogrammable MEF with Dox in the presence  
275 of a well validated MEK inhibitor, PD032591, ranging from 0.05  $\mu$ M to 1  $\mu$ M, a staple of the 2i  
276 media for cultivating naïve ESC<sup>65</sup>. Progression toward pluripotency was monitored by flow  
277 cytometry for %Oct4:GFP+ (Fig. 6a). Strikingly, in the presence of 0.1  $\mu$ M of PD032591, >60%  
278 of all cells became Oct4:GFP+ by 13 days and ~80% cells were Oct4:GFP+ on day 21 (Fig.

279 S6a,b). In contrast, the %Oct4:GFP+ remained low throughout in 0.05 or 0.25  $\mu$ M of PD032591.  
280 The effect of mild ERK inhibition was confirmed by western blotting for pERK (Fig. 6b,c). Of  
281 note, there was a sharp drop in pERK level between reprogramming day 4 and 7. While 0.1  $\mu$ M  
282 PD0325901 had no discernible inhibition of pERK on day 4, the inhibition became clear on day  
283 7. We repeated this mild inhibition by another ERK inhibitor, U0126. Low dose U0126 also  
284 significantly increased the %Oct4:GFP+ cells, albeit to a lesser extent than PD0325901 (Fig.  
285 S6c-f). Therefore, somatic cell reprogramming into pluripotency is greatly increased when ERK  
286 activity is tuned within a narrow range. We interpreted these results to indicate that the  
287 probability of a given cell to tune their ERK activity within this range is low (i.e. stochastic); when  
288 enforced pharmacologically, reprogramming into pluripotency is no longer rare and could occur  
289 in most cells (Fig. S6g). Consistently, 0.1  $\mu$ M PD0325901 became ineffective in cells that  
290 already express NLS-actin or have TFII- $\Delta$  KD (Fig. 6d-f). Therefore, excessive ERK inhibition  
291 by combining molecular and chemical inhibitors yields a cell state that is no longer permissive  
292 for pluripotency initiation.

293  
294 With the insights that mild reduction in ERK activity could be how NLS-actin promotes  
295 reprogramming, we re-examined the transcriptomes of reprogramming MEF expressing the  
296 actin constructs (Fig. 2b). To this end, we found that a small subset of ERK target genes,  
297 originally defined using optogenetically controlled ERK<sup>71</sup> (ERK<sup>pulse</sup>), were significantly down-  
298 regulated in NLS-actin expressing cells (Fig. 6g); most other ERK targets did not change with  
299 NLS-actin expression (Fig. 6h). Of note, although this subset of ERK target genes was originally  
300 defined following pulsatile ERK activation, it is likely that their expression reflects other states of  
301 subtle ERK signaling as well. Nonetheless, NLS-actin expression dampens ERK activity and  
302 reduces the expression of a small subset of ERK target genes, including several immediate  
303 early genes that are known to inhibit pluripotency<sup>72</sup>.

304

### 305 **Actin fails to accumulate in the nucleus below a threshold nuclear height**

306 The increase in reprogramming efficiency by NLS-actin was less profound than chemical ERK  
307 tuning, suggesting unknown processes counteracting the cells' tuning ability even in the  
308 presence of NLS-actin expression. The manipulations that changed reprogramming efficiency in  
309 our experiments had consistent effects on colony morphology: colonies failing to activate  
310 Oct4:GFP appeared more spread or flat. We therefore assessed if/how cell height is altered, a  
311 morphologic parameter that was recently recognized to dictate cell behavior<sup>73,74,75</sup>. Following  
312 the measurements determined in these studies, we first reprogrammed cells using a cell height  
313 confiner (Fig. 7a,b) at 5 or 10  $\mu$ m. While some Oct4:GFP+ colonies could be found under 10  $\mu$ m  
314 confinement, no Oct4:GFP+ colonies were present under 5  $\mu$ m confinement (Fig. S7a). The  
315 cells outside of the confinement area remained Oct4:GFP+ and had typical dome morphology,  
316 indicating that the loss of Oct4:GFP is specific to the cells under height-confinement (Fig. 7b,  
317 Fig. S7a). As the colonies under 10  $\mu$ m confinement appeared partially flattened, we increased  
318 confinement height to 20  $\mu$ m. Under 20  $\mu$ m, Oct4:GFP+ colonies of normal morphology  
319 appeared (Fig. 7c,d, Fig. S7b). 10  $\mu$ m confinement reduced the number and intensity of  
320 Oct4:GFP+ cells. Under 5  $\mu$ m confinement, only fibroblastic-like cells could be identified and  
321 none were Oct4:GFP+. These results demonstrate that cells need to reach a minimal height of  
322 10  $\mu$ m to reactive *Oct4*, whereas 20  $\mu$ m is the permissive cell height. Importantly, at 10  $\mu$ m or 5  
323  $\mu$ m height, NLS-actin was no longer found inside the nucleus, indicating that sufficient cell  
324 height is required for actin to enrich inside the nucleus (Fig. 7e,f). Lastly, we confined ESC  
325 derived from the inner cell mass of Oct4:GFP mouse for 16 hours (Fig. 7g,h, Fig. S7c). Similar  
326 to the reprogramming cells, these already pluripotent stem cells retained normal colony  
327 morphology and remained Oct4:GFP+ under 20  $\mu$ m confinement. 10  $\mu$ m confinement partially  
328 flattened the colonies and reduced Oct4:GFP intensity. Strikingly, colonies under 5  $\mu$ m



329 confinement lost Oct4:GFP fluorescence without any other differentiation-inducing signals (Fig.  
330 7g,h, Fig. S7c). These results indicate that cell height could alter actin's nuclear allocation, and  
331 has a dominating effect to inhibit pluripotency gene expression.

332  
333 Fibroblast reprogramming cultures (e.g. day 6-8) primarily contain two types of cells readily  
334 distinguishable by morphology and/or their relationship with neighboring cells: clusters of cells  
335 appearing as colonies and those retaining fibroblast morphology (Fig. 7i, Movie S4). We  
336 determined the fibroblastic cells to have a typical nuclear height of  $\sim 5 \mu\text{m}$ , while the cells in  
337 colonies reach  $\sim 10 \mu\text{m}$  in height (Fig. 7j,k). Cells expressing NLS-actin, but not those  
338 expressing WT  $\beta$ -actin, or point mutants NLS-actin<sup>G13R</sup> and NLS-actin<sup>S14C</sup>, had nuclear height to  
339 be around or above  $10 \mu\text{m}$ . Furthermore, TFII- $\Delta$  KD or NLS-actin expression individually  
340 increased nuclear height, but their combination resulted in low nuclear height (Fig. 7l-n). Taken  
341 together, the ERK-tuning by TFII- $\Delta$  likely mediates the actin reallocation and cell morphologic  
342 changes accompanying reprogramming.

343  
344

## 345 Discussion

346 Yamanaka reprogramming from most somatic states is rare, which occurs stochastically, as  
347 each cell has a low, random chance of reprogramming (Fig. S6g) <sup>76-79</sup>. Our earlier work has  
348 revealed that reprogramming stochasticity is absent in a rare population of myeloid progenitors  
349 which exhibit unusually fast cell cycle <sup>80,81</sup>. Prospective isolation of the fast-cycling subpopulation  
350 of fibroblasts drastically enriches for reprogramming activity. Strikingly, these fast-cycling  
351 fibroblasts display a much less spread cell morphology <sup>37,54,82</sup> that we now show to being taller.  
352 One of the most profound changes that occurs during reprogramming is a switch in the  
353 biological interpretation of ERK signaling at the cellular level: in nearly all differentiated types,  
354 ERK activity is pro-proliferative, but in pluripotent stem cells ERK activity must be kept low to  
355 avoid differentiation. Fine-tuning this ERK activity transition dramatically increases  
356 reprogramming efficiency, so that most cells in culture can activate pluripotent gene expression.  
357 We propose that cell morphology integrates into cell identity regulation by titrating ERK activity:  
358 much more actin is being allocated into the nucleus as cells change identity. At least one  
359 consequence of the nuclear accumulated actin is to sequester TFII- $\Delta$ , thereby inhibiting this  
360 mode of ERK activation. This model deepens the connection between cell  
361 morphology/mechanics and cell identity/behavior found in other biological systems <sup>83-85</sup>, as well  
362 as in pluripotent stem cells <sup>68,86,87</sup>.

363  
364 Nuclear actin is known to be present in large quantity in frog oocyte germinal vesicles <sup>88</sup>. These  
365 exceptionally large cells collapse to gravity when this nuclear actin meshwork is disrupted <sup>89</sup>.  
366 Given this insight, it is perhaps not surprising why polymerized actin is required in the germinal  
367 vesicle to reprogram the transplanted somatic nuclei, as shown by Gurdon and colleagues <sup>41</sup>.  
368 Mammalian somatic cells are five orders of magnitude smaller, where the possibility that nuclear  
369 actin primarily functions by mechanical support becomes slim. However, injected somatic nuclei  
370 do undergo prominent "swelling" in this system <sup>90</sup>. Filamentous actin also form in mammalian  
371 somatic nucleus immediately after mitosis, expanding the compact postmitotic nucleus to that of  
372 G1 conformation; interfering with nuclear actin pool size or polymerization leads to significantly  
373 reduced nuclear volume <sup>46</sup>. Across these diverse biological contexts, a coherent theme appears  
374 to be nuclear actin's role in modulating the size and/or morphology of the nucleus. In this  
375 regard, we found that allocating more actin into the nucleus increases nuclear height, and  
376 sufficient height is necessary for actin's nuclear enrichment (Fig. 7).

377

378 The importance of nuclear height has only begun to be appreciated<sup>73,74,75</sup>. In 2D cultured cells,  
379 confining cell height to 5  $\mu\text{m}$ , but not 10  $\mu\text{m}$ , triggers actomyosin contractility due to stretching of  
380 the nuclear membrane and activating the mechanosensitive calcium channels leading to  $\text{Ca}^{2+}$   
381 directed actomyosin contractility<sup>73</sup>. Similar findings are seen in cells in 3D tissues<sup>75</sup>. Insights  
382 from these complementary contexts paint a model for how restrictive nuclear dimensions control  
383 cell's contractility, perhaps enabling it to "run away" when severely confined. This intuitive model  
384 lends insights into why NLS-actin fail to concentrate in the flattened nucleus (Fig. 7e,f), as a  
385 contractile cytoplasm likely draws monomeric actin away from the nucleus. However, the full  
386 picture is likely more complex (e.g. whether there is involvement of nuclear  $\text{Ca}^{2+}$ <sup>91</sup> was not  
387 considered). Experimental approaches with sufficient temporal and spatial resolution/precision  
388 allowing the detection of rapid and subcellular signaling dynamics are required to further delve  
389 into this problem.

390  
391 Our approach in identifying TFII-I as an actin-binding protein is inherently biased toward highly  
392 abundant nuclear proteins and/or strong binding affinity (Fig. 3a-c), suggesting potential  
393 generalizability. In mice, *Gtf2i* inactivation results in early embryonic lethality<sup>92</sup>. In humans,  
394 hemizygous deletion of *GTF2I* genomic region is associated with neurodevelopmental deficits  
395 known as Williams-Beuren Syndrome, while its duplication leads to autism spectrum disorders  
396<sup>92-94</sup>. Single nucleotide polymorphisms at *GTF2I* loci are associated with autoimmune diseases  
397<sup>95-97</sup>. A point mutation (L424H) is prevalent in thymic epithelial tumors<sup>98</sup>. Contrasting its  
398 importance in development and diseases, the understanding of how *GTF2I* abnormality causes  
399 diseases is limited. Our work is partly based on the previous reports on how *Gtf2i*/TFII-I  
400 participates in regulation via interactions with ERK<sup>32,99,28</sup>. The involvement for this actin-TFII-I-  
401 ERK axis in other cellular contexts awaits further examination. With multiple MEK/ERK inhibitors  
402 in the clinics, our model suggestions that dosages of such pharmacologic agents need to be  
403 taken into consideration to achieve desired effects. The small subset of down-regulated genes by  
404 NLS-actin, such as *c-fos*, are well validated targets of ERK and TFII-I. How TFII-I-ERK functions  
405 to transcriptionally regulate pluripotency also awaits further investigation.

406  
407

## 408 **Material and Methods**

409

### 410 Cell culture and reprogramming

411 All mouse work was approved by the Institutional Animal Care and Use Committee of Yale  
412 University. The reprogrammable mice with reporter (R26rtTA;Col1a14F2A;Oct4GFP) were  
413 derived by crossing reprogrammable mice with Oct4:GFP mice, which has been described  
414 before.

415

### 416 DNA constructs

417 All Actin constructs were cloned into pMSCV-IRES-blasticidin backbone. The shRNAs targeting  
418 to Xpo6, *Gtf2i* and its  $\beta$  isoform were generated by inserting the short hairpin sequence into the  
419 lentiviral backbone psi-LVRU6MP (GeneCopia), the sequences are listed in Supplementary  
420 Table 5, The pSFG-GFP, pSFG-TFII-I-GFP delta and pSFG-TFII-I-GFP Y248&249F were  
421 obtained from Addgene(#22199, #22190, #22196).

422

### 423 Western blotting and immunofluorescence

424 All procedures and antibodies used in protein analyses are listed in the accompanying  
425 supplementary materials.

426

### 427 RNAseq and analysis (GSEA, CellNet)

428 RNA-seq libraries were prepared with TruSeq Stranded mRNA Library Prep Kit (Illumina, RS-  
429 122-2101) following the manufacturer's instructions. Sequencing was performed with the  
430 Illumina HiSeq 4000 Sequencing System. For data analysis, the RNA-seq reads were mapped  
431 to mouse genome (mm10) with TopHat2 software. Gene abundance was calculated using  
432 cuffnorm, which gene expression levels and Fragments per kilobase per million (FPKM). Genes  
433 with FPKM  $\geq 1$  in two or more samples were selected for further analysis. Differentially  
434 expressed genes (DEGs) were identified by Cuffdiff followed by cutting off with FDR-adjusted P  
435 value  $< 0.05$  and fold change  $> 2$ . MA plot of differentially expressed genes was also done with  
436 the R software. RNA-seq raw data and processed data have been deposited as GSE229191.  
437 GO analysis of differentially expressed genes was performed with R.

#### 438 439 Cell height confinement

440 Cells were seeded and cultured in 6-well static cell confiner device (4Dcell, France) at day 6,  
441 allowed to reprogram until day 14 or 12. ImageExpress Micro 4 Imaging system were used for  
442 imaging the phase and Oct4:GFP colony counting. Leica Stellaris confocal microscope platform  
443 were used for imaging the live cell mCherry and Oct4:GFP, Oct4:GFP cell counting and  
444 measure Oct4:GFP intensity. NLS-Actin transduced cell on reprogramming day12 were fixed  
445 and stained using FLAG antibody. N/C ratio of FLAG intensity was calculated using LAS AF  
446 software. Oct4:GFP expressed ESC were seeded in 6-well static cell confiner device for 16  
447 hours for imaging the live cells of Oct4:GFP and intensity measurement.

#### 448 449 Construction of custom sgRNA library and screening

450 The online web tool CHOPCHOP (<https://chopchop.cbu.uib.no/>) was used to generate sgRNA  
451 designs against target genes. For each gene, 4 sgRNAs were chosen based on the location and  
452 score. Screening is done by following the Zhang Lab's protocols with minor modification.

#### 453 454 **Supplemental Materials (with full description of materials and procedures)**

455 Four supplementary tables (Table S1-4) and movies (Movie S1-4) accompany this manuscript.  
456 Supplementary Table S5 contains sequences for all primers used.

#### 457 458 459 **References**

- 460  
461 1 Ware, CB. Concise Review: Lessons from Naive Human Pluripotent Cells. *Stem Cells* 2017  
462 **35**, 35.
- 463 2 Robinton, DA & Daley, GQ. The promise of induced pluripotent stem cells in research  
464 and therapy. *Nature* 2012 **481**, 295.
- 465 3 Barooji, YF, Hvid, KG, Petitjean, II, Brickman, JM, Oddershede, LB & Bendix, PM. Changes  
466 in Cell Morphology and Actin Organization in Embryonic Stem Cells Cultured under  
467 Different Conditions. *Cells* 2021 **10**.
- 468 4 Khatau, SB, Hale, CM, Stewart-Hutchinson, PJ, Patel, MS, Stewart, CL, Searson, PC *et al.*  
469 A perinuclear actin cap regulates nuclear shape. *Proc Natl Acad Sci U S A* 2009 **106**,  
470 19017.
- 471 5 Davidson, PM & Cadot, B. Actin on and around the Nucleus. *Trends Cell Biol* 2021 **31**,  
472 211.
- 473 6 Nag, S, Larsson, M, Robinson, RC & Burtnick, LD. Gelsolin: the tail of a molecular  
474 gymnast. *Cytoskeleton (Hoboken)* 2013 **70**, 360.

- 475 7 Amann, KJ & Pollard, TD. The Arp2/3 complex nucleates actin filament branches from  
476 the sides of pre-existing filaments. *Nat Cell Biol* 2001 **3**, 306.
- 477 8 McGough, AM, Staiger, CJ, Min, JK & Simonetti, KD. The gelsolin family of actin  
478 regulatory proteins: modular structures, versatile functions. *FEBS Lett* 2003 **552**, 75.
- 479 9 Carley, E, King, MC & Guo, S. Integrating mechanical signals into cellular identity. *Trends*  
480 *Cell Biol* 2022.
- 481 10 Zimmermann, D & Kovar, DR. Feeling the force: formin's role in mechanotransduction.  
482 *Curr Opin Cell Biol* 2019 **56**, 130.
- 483 11 Schwarz, US & Gardel, ML. United we stand: integrating the actin cytoskeleton and cell-  
484 matrix adhesions in cellular mechanotransduction. *J Cell Sci* 2012 **125**, 3051.
- 485 12 Papalazarou, V & Machesky, LM. The cell pushes back: The Arp2/3 complex is a key  
486 orchestrator of cellular responses to environmental forces. *Curr Opin Cell Biol* 2020 **68**,  
487 37.
- 488 13 Wickstrom, SA & Roca-Cusachs, P. Special issue on "mechanotransduction in cell fate  
489 determination" - From molecular switches to organ-level regulation. *Exp Cell Res* 2019  
490 **382**, 111452.
- 491 14 Pollard, TD. Actin and Actin-Binding Proteins. *Cold Spring Harb Perspect Biol* 2016 **8**.
- 492 15 Dominguez, R & Holmes, KC. Actin structure and function. *Annu Rev Biophys* 2011 **40**,  
493 169.
- 494 16 Plessner, M, Melak, M, Chinchilla, P, Baarlink, C & Grosse, R. Nuclear F-actin formation  
495 and reorganization upon cell spreading. *J Biol Chem* 2015 **290**, 11209.
- 496 17 Percipalle, P & Vartiainen, M. Cytoskeletal proteins in the cell nucleus: a special nuclear  
497 actin perspective. *Mol Biol Cell* 2019 **30**, 1781.
- 498 18 Plessner, M & Grosse, R. Dynamizing nuclear actin filaments. *Curr Opin Cell Biol* 2019  
499 **56**, 1.
- 500 19 Kelsch, DJ & Tootle, TL. Nuclear Actin: From Discovery to Function. *Anat Rec (Hoboken)*  
501 *2018* **301**, 1999.
- 502 20 Miyamoto, K & Gurdon, JB. Nuclear actin and transcriptional activation. *Commun Integr*  
503 *Biol* 2011 **4**, 582.
- 504 21 Serebryanny, LA, Parilla, M, Annibale, P, Cruz, CM, Laster, K, Gratton, E *et al.* Persistent  
505 nuclear actin filaments inhibit transcription by RNA polymerase II. *J Cell Sci* 2016 **129**,  
506 3412.
- 507 22 Vartiainen, MK, Guettler, S, Larijani, B & Treisman, R. Nuclear actin regulates dynamic  
508 subcellular localization and activity of the SRF cofactor MAL. *Science* 2007 **316**, 1749.
- 509 23 Fiore, A, Spencer, VA, Mori, H, Carvalho, HF, Bissell, MJ & Bruni-Cardoso, A. Laminin-111  
510 and the Level of Nuclear Actin Regulate Epithelial Quiescence via Exportin-6. *Cell Rep*  
511 *2017* **19**, 2102.
- 512 24 Serebryanny, L & de Lanerolle, P. Nuclear actin: The new normal. *Mutat Res* 2020 **821**,  
513 111714.
- 514 25 Kapoor, P, Chen, M, Winkler, DD, Luger, K & Shen, X. Evidence for monomeric actin  
515 function in INO80 chromatin remodeling. *Nat Struct Mol Biol* 2013 **20**, 426.
- 516 26 Hyrskyluoto, A & Vartiainen, MK. Regulation of nuclear actin dynamics in development  
517 and disease. *Curr Opin Cell Biol* 2020 **64**, 18.

- 518 27 Makeyev, AV & Bayarsaihan, D. Alternative splicing and promoter use in TFII-I genes.  
519 *Gene* 2009 **433**, 16.
- 520 28 Caraveo, G, van Rossum, DB, Patterson, RL, Snyder, SH & Desiderio, S. Action of TFII-I  
521 outside the nucleus as an inhibitor of agonist-induced calcium entry. *Science* 2006 **314**,  
522 122.
- 523 29 Kim, DW, Cheriya, V, Roy, AL & Cochran, BH. TFII-I enhances activation of the c-fos  
524 promoter through interactions with upstream elements. *Mol Cell Biol* 1998 **18**, 3310.
- 525 30 Kim, DW & Cochran, BH. JAK2 activates TFII-I and regulates its interaction with  
526 extracellular signal-regulated kinase. *Mol Cell Biol* 2001 **21**, 3387.
- 527 31 Cheriya, V & Roy, AL. Alternatively spliced isoforms of TFII-I. Complex formation,  
528 nuclear translocation, and differential gene regulation. *J Biol Chem* 2000 **275**, 26300.
- 529 32 Mammoto, A, Connor, KM, Mammoto, T, Yung, CW, Huh, D, Aderman, CM *et al.* A  
530 mechanosensitive transcriptional mechanism that controls angiogenesis. *Nature* 2009  
531 **457**, 1103.
- 532 33 Hakre, S, Tussie-Luna, MI, Ashworth, T, Novina, CD, Settleman, J, Sharp, PA *et al.*  
533 Opposing functions of TFII-I spliced isoforms in growth factor-induced gene expression.  
534 *Mol Cell* 2006 **24**, 301.
- 535 34 Miano, JM, Long, X & Fujiwara, K. Serum response factor: master regulator of the actin  
536 cytoskeleton and contractile apparatus. *American journal of physiology. Cell physiology*  
537 2007 **292**, C70.
- 538 35 Miralles, F, Posern, G, Zaromytidou, AI & Treisman, R. Actin dynamics control SRF  
539 activity by regulation of its coactivator MAL. *Cell* 2003 **113**, 329.
- 540 36 Sotiropoulos, A, Gineitis, D, Copeland, J & Treisman, R. Signal-regulated activation of  
541 serum response factor is mediated by changes in actin dynamics. *Cell* 1999 **98**, 159.
- 542 37 Hu, X, Wu, Q, Zhang, J, Kim, J, Chen, X, Hartman, AA *et al.* Reprogramming progressive  
543 cells display low CAG promoter activity. *Stem Cells* 2021 **39**, 43.
- 544 38 Stadtfeld, M, Maherali, N, Borkent, M & Hochedlinger, K. A reprogrammable mouse  
545 strain from gene-targeted embryonic stem cells. *Nat Methods* 2010 **7**, 53.
- 546 39 Hochedlinger, K, Yamada, Y, Beard, C & Jaenisch, R. Ectopic expression of Oct-4 blocks  
547 progenitor-cell differentiation and causes dysplasia in epithelial tissues. *Cell* 2005 **121**,  
548 465.
- 549 40 Posern, G, Sotiropoulos, A & Treisman, R. Mutant actins demonstrate a role for  
550 unpolymerized actin in control of transcription by serum response factor. *Mol Biol Cell*  
551 2002 **13**, 4167.
- 552 41 Miyamoto, K, Pasque, V, Jullien, J & Gurdon, JB. Nuclear actin polymerization is required  
553 for transcriptional reprogramming of Oct4 by oocytes. *Genes Dev* 2011 **25**, 946.
- 554 42 Esnault, C, Stewart, A, Gualdrini, F, East, P, Horswell, S, Matthews, N *et al.* Rho-actin  
555 signaling to the MRTF coactivators dominates the immediate transcriptional response to  
556 serum in fibroblasts. *Genes Dev* 2014 **28**, 943.
- 557 43 Subramanian, A, Tamayo, P, Mootha, VK, Mukherjee, S, Ebert, BL, Gillette, MA *et al.*  
558 Gene set enrichment analysis: a knowledge-based approach for interpreting genome-  
559 wide expression profiles. *Proc Natl Acad Sci U S A* 2005 **102**, 15545.
- 560 44 Polo, JM, Anderssen, E, Walsh, RM, Schwarz, BA, Nefzger, CM, Lim, SM *et al.* A  
561 molecular roadmap of reprogramming somatic cells into iPS cells. *Cell* 2012 **151**, 1617.

- 562 45 Schrank, BR, Aparicio, T, Li, Y, Chang, W, Chait, BT, Gundersen, GG *et al.* Nuclear ARP2/3  
563 drives DNA break clustering for homology-directed repair. *Nature* 2018 **559**, 61.
- 564 46 Baarlink, C, Plessner, M, Sherrard, A, Morita, K, Misu, S, Virant, D *et al.* A transient pool  
565 of nuclear F-actin at mitotic exit controls chromatin organization. *Nat Cell Biol* 2017 **19**,  
566 1389.
- 567 47 Caridi, CP, Plessner, M, Grosse, R & Chiolo, I. Nuclear actin filaments in DNA repair  
568 dynamics. *Nat Cell Biol* 2019 **21**, 1068.
- 569 48 Caridi, CP, D'Agostino, C, Ryu, T, Zapotoczny, G, Delabaere, L, Li, X *et al.* Nuclear F-actin  
570 and myosins drive relocalization of heterochromatic breaks. *Nature* 2018 **559**, 54.
- 571 49 Dopie, J, Skarp, KP, Rajakyla, EK, Tanhuanpaa, K & Vartiainen, MK. Active maintenance  
572 of nuclear actin by importin 9 supports transcription. *Proc Natl Acad Sci U S A* 2012 **109**,  
573 E544.
- 574 50 Hurst, V, Shimada, K & Gasser, SM. Nuclear Actin and Actin-Binding Proteins in DNA  
575 Repair. *Trends Cell Biol* 2019 **29**, 462.
- 576 51 Spencer, VA, Costes, S, Inman, JL, Xu, R, Chen, J, Hendzel, MJ *et al.* Depletion of nuclear  
577 actin is a key mediator of quiescence in epithelial cells. *J Cell Sci* 2011 **124**, 123.
- 578 52 Parisis, N, Krasinska, L, Harker, B, Urbach, S, Rossignol, M, Camasses, A *et al.* Initiation of  
579 DNA replication requires actin dynamics and formin activity. *EMBO J* 2017 **36**, 3212.
- 580 53 Nieminuszczy, J, Martin, PR, Broderick, R, Krwawicz, J, Kanellou, A, Mocanu, C *et al.*  
581 Actin nucleators safeguard replication forks by limiting nascent strand degradation.  
582 *Nucleic Acids Res* 2023.
- 583 54 Hartman, AA, Scalf, SM, Zhang, J, Hu, X, Chen, X, Eastman, AE *et al.* YAP Non-cell-  
584 autonomously Promotes Pluripotency Induction in Mouse Cells. *Stem Cell Reports* 2020  
585 **14**, 730.
- 586 55 Morris, SA, Cahan, P, Li, H, Zhao, AM, San Roman, AK, Shivdasani, RA *et al.* Dissecting  
587 engineered cell types and enhancing cell fate conversion via CellNet. *Cell* 2014 **158**, 889.
- 588 56 Wang, B, Wang, M, Zhang, W, Xiao, T, Chen, CH, Wu, A *et al.* Integrative analysis of  
589 pooled CRISPR genetic screens using MAGeCKFlute. *Nat Protoc* 2019 **14**, 756.
- 590 57 Li, W, Xu, H, Xiao, T, Cong, L, Love, MI, Zhang, F *et al.* MAGeCK enables robust  
591 identification of essential genes from genome-scale CRISPR/Cas9 knockout screens.  
592 *Genome Biol* 2014 **15**, 554.
- 593 58 Yang, CS, Chang, KY & Rana, TM. Genome-wide functional analysis reveals factors  
594 needed at the transition steps of induced reprogramming. *Cell Rep* 2014 **8**, 327.
- 595 59 Roy, AL, Du, H, Gregor, PD, Novina, CD, Martinez, E & Roeder, RG. Cloning of an inr-and  
596 E-box-binding protein, TFII-I, that interacts physically and functionally with USF1. *The*  
597 *EMBO journal* 1997 **16**, 7091.
- 598 60 Roy, AL. Pathophysiology of TFII-I: Old Guard Wearing New Hats. *Trends Mol Med* 2017  
599 **23**, 501.
- 600 61 Hamilton, WB & Brickman, JM. Erk signaling suppresses embryonic stem cell self-  
601 renewal to specify endoderm. *Cell Rep* 2014 **9**, 2056.
- 602 62 Kim, SH, Kim, MO, Cho, YY, Yao, K, Kim, DJ, Jeong, CH *et al.* ERK1 phosphorylates Nanog  
603 to regulate protein stability and stem cell self-renewal. *Stem Cell Res* 2014 **13**, 1.

- 604 63 Chen, H, Guo, R, Zhang, Q, Guo, H, Yang, M, Wu, Z *et al.* Erk signaling is indispensable for  
605 genomic stability and self-renewal of mouse embryonic stem cells. *Proc Natl Acad Sci U*  
606 *S A* 2015 **112**, E5936.
- 607 64 Ma, X, Chen, H & Chen, L. A dual role of Erk signaling in embryonic stem cells. *Exp*  
608 *Hematol* 2016 **44**, 151.
- 609 65 Ying, QL, Wray, J, Nichols, J, Batlle-Morera, L, Doble, B, Woodgett, J *et al.* The ground  
610 state of embryonic stem cell self-renewal. *Nature* 2008 **453**, 519.
- 611 66 Simon, CS, Rahman, S, Raina, D, Schroter, C & Hadjantonakis, AK. Live Visualization of  
612 ERK Activity in the Mouse Blastocyst Reveals Lineage-Specific Signaling Dynamics. *Dev*  
613 *Cell* 2020 **55**, 341.
- 614 67 Hamilton, WB, Mosesson, Y, Monteiro, RS, Emdal, KB, Knudsen, TE, Francavilla, C *et al.*  
615 Dynamic lineage priming is driven via direct enhancer regulation by ERK. *Nature* 2019  
616 **575**, 355.
- 617 68 De Belly, H, Stubb, A, Yanagida, A, Labouesse, C, Jones, PH, Paluch, EK *et al.* Membrane  
618 Tension Gates ERK-Mediated Regulation of Pluripotent Cell Fate. *Cell Stem Cell* 2021 **28**,  
619 273.
- 620 69 Regot, S, Hughey, JJ, Bajar, BT, Carrasco, S & Covert, MW. High-sensitivity  
621 measurements of multiple kinase activities in live single cells. *Cell* 2014 **157**, 1724.
- 622 70 de la Cova, C, Townley, R, Regot, S & Greenwald, I. A Real-Time Biosensor for ERK  
623 Activity Reveals Signaling Dynamics during *C. elegans* Cell Fate Specification. *Dev Cell*  
624 2017 **42**, 542.
- 625 71 Aoki, K, Kumagai, Y, Sakurai, A, Komatsu, N, Fujita, Y, Shionyu, C *et al.* Stochastic ERK  
626 activation induced by noise and cell-to-cell propagation regulates cell density-  
627 dependent proliferation. *Mol Cell* 2013 **52**, 529.
- 628 72 Liu, J, Han, Q, Peng, T, Peng, M, Wei, B, Li, D *et al.* The oncogene c-Jun impedes somatic  
629 cell reprogramming. *Nat Cell Biol* 2015 **17**, 856.
- 630 73 Lomakin, AJ, Cattin, CJ, Cuvelier, D, Alraies, Z, Molina, M, Nader, GPF *et al.* The nucleus  
631 acts as a ruler tailoring cell responses to spatial constraints. *Science* 2020 **370**.
- 632 74 Shen, Z & Niethammer, P. A cellular sense of space and pressure. *Science* 2020 **370**,  
633 295.
- 634 75 Venturini, V, Pezzano, F, Catala Castro, F, Hakkinen, HM, Jimenez-Delgado, S, Colomer-  
635 Rosell, M *et al.* The nucleus measures shape changes for cellular proprioception to  
636 control dynamic cell behavior. *Science* 2020 **370**.
- 637 76 Yamanaka, S. Elite and stochastic models for induced pluripotent stem cell generation.  
638 *Nature* 2009 **460**, 49.
- 639 77 Hanna, J, Saha, K, Pando, B, van Zon, J, Lengner, CJ, Creyghton, MP *et al.* Direct cell  
640 reprogramming is a stochastic process amenable to acceleration. *Nature* 2009 **462**, 595.
- 641 78 Buganim, Y, Faddah, DA, Cheng, AW, Itskovich, E, Markoulaki, S, Ganz, K *et al.* Single-cell  
642 expression analyses during cellular reprogramming reveal an early stochastic and a late  
643 hierarchic phase. *Cell* 2012 **150**, 1209.
- 644 79 Liu, LL, Brumbaugh, J, Bar-Nur, O, Smith, Z, Stadtfeld, M, Meissner, A *et al.* Probabilistic  
645 Modeling of Reprogramming to Induced Pluripotent Stem Cells. *Cell Rep* 2016 **17**, 3395.
- 646 80 Guo, S, Zi, X, Schulz, VP, Cheng, J, Zhong, M, Koochaki, SH *et al.* Nonstochastic  
647 reprogramming from a privileged somatic cell state. *Cell* 2014 **156**, 649.

- 648 81 Megyola, CM, Gao, Y, Teixeira, AM, Cheng, J, Heydari, K, Cheng, EC *et al.* Dynamic  
649 migration and cell-cell interactions of early reprogramming revealed by high-resolution  
650 time-lapse imaging. *Stem Cells* 2013 **31**, 895.
- 651 82 Hu, X, Liu, ZZ, Chen, X, Schulz, VP, Kumar, A, Hartman, AA *et al.* MKL1-actin pathway  
652 restricts chromatin accessibility and prevents mature pluripotency activation. *Nat*  
653 *Commun* 2019 **10**, 1695.
- 654 83 Sailem, HZ & Bakal, C. Identification of clinically predictive metagenes that encode  
655 components of a network coupling cell shape to transcription by image-omics. *Genome*  
656 *Res* 2017 **27**, 196.
- 657 84 Aoki, K, Kondo, Y, Naoki, H, Hiratsuka, T, Itoh, RE & Matsuda, M. Propagating Wave of  
658 ERK Activation Orients Collective Cell Migration. *Dev Cell* 2017 **43**, 305.
- 659 85 Farahani, PE, Lemke, SB, Dine, E, Uribe, G, Toettcher, JE & Nelson, CM. Substratum  
660 stiffness regulates Erk signaling dynamics through receptor-level control. *Cell Rep* 2021  
661 **37**, 110181.
- 662 86 Bergert, M, Lembo, S, Sharma, S, Russo, L, Milovanovic, D, Gretarsson, KH *et al.* Cell  
663 Surface Mechanics Gate Embryonic Stem Cell Differentiation. *Cell Stem Cell* 2021 **28**,  
664 209.
- 665 87 Wong, SY, Soto, J & Li, S. Biophysical regulation of cell reprogramming. *Curr Opin Chem*  
666 *Eng* 2017 **15**, 95.
- 667 88 Clark, TG & Merriam, RW. Diffusible and bound actin nuclei of *Xenopus laevis* oocytes.  
668 *Cell* 1977 **12**, 883.
- 669 89 Feric, M & Brangwynne, CP. A nuclear F-actin scaffold stabilizes ribonucleoprotein  
670 droplets against gravity in large cells. *Nat Cell Biol* 2013 **15**, 1253.
- 671 90 Gurdon, JB. Injected nuclei in frog oocytes: fate, enlargement, and chromatin dispersal. *J*  
672 *Embryol Exp Morphol* 1976 **36**, 523.
- 673 91 Nava, MM, Miroshnikova, YA, Biggs, LC, Whitefield, DB, Metge, F, Boucas, J *et al.*  
674 Heterochromatin-Driven Nuclear Softening Protects the Genome against Mechanical  
675 Stress-Induced Damage. *Cell* 2020 **181**, 800.
- 676 92 Enkhmandakh, B, Makeyev, AV, Erdenechimeg, L, Ruddle, FH, Chimge, NO, Tussie-Luna,  
677 MI *et al.* Essential functions of the Williams-Beuren syndrome-associated TFII-I genes in  
678 embryonic development. *Proc Natl Acad Sci U S A* 2009 **106**, 181.
- 679 93 Chailangkarn, T, Noree, C & Muotri, AR. The contribution of GTF2I haploinsufficiency to  
680 Williams syndrome. *Mol Cell Probes* 2018 **40**, 45.
- 681 94 Mervis, CB, Dida, J, Lam, E, Crawford-Zelli, NA, Young, EJ, Henderson, DR *et al.*  
682 Duplication of GTF2I results in separation anxiety in mice and humans. *Am J Hum Genet*  
683 2012 **90**, 1064.
- 684 95 Meng, Y, He, Y, Zhang, J, Xie, Q, Yang, M, Chen, Y *et al.* Association of GTF2I gene  
685 polymorphisms with renal involvement of systemic lupus erythematosus in a Chinese  
686 population. *Medicine (Baltimore)* 2019 **98**, e16716.
- 687 96 Kim, K, Bang, SY, Ikari, K, Yoo, DH, Cho, SK, Choi, CB *et al.* Association-heterogeneity  
688 mapping identifies an Asian-specific association of the GTF2I locus with rheumatoid  
689 arthritis. *Sci Rep* 2016 **6**, 27563.



- 690 97 Li, Y, Zhang, K, Chen, H, Sun, F, Xu, J, Wu, Z *et al.* A genome-wide association study in  
691 Han Chinese identifies a susceptibility locus for primary Sjogren's syndrome at 7q11.23.  
692 *Nat Genet* 2013 **45**, 1361.
- 693 98 Petrini, I, Meltzer, PS, Kim, IK, Lucchi, M, Park, KS, Fontanini, G *et al.* A specific missense  
694 mutation in GTF2I occurs at high frequency in thymic epithelial tumors. *Nat Genet* 2014  
695 **46**, 844.
- 696 99 Jiang, W, Sordella, R, Chen, GC, Hakre, S, Roy, AL & Settleman, J. An FF domain-  
697 dependent protein interaction mediates a signaling pathway for growth factor-induced  
698 gene expression. *Mol Cell* 2005 **17**, 23.
- 699

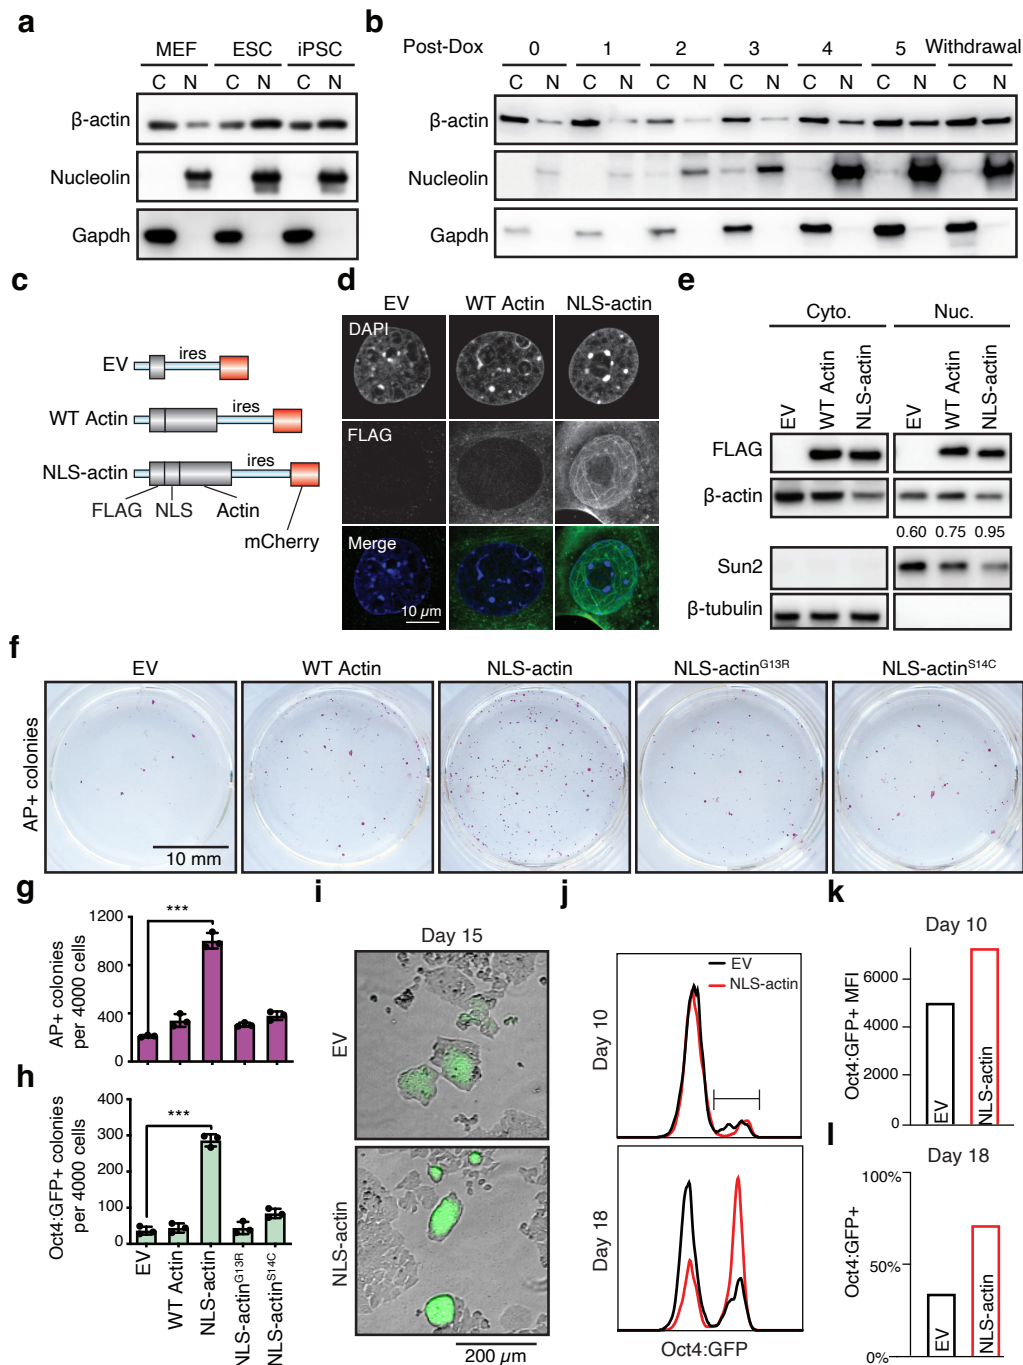

**Fig. 1. More actin in the nucleus favors pluripotency.** **a,b** Representative western blot analysis of the cytoplasmic (C) and nuclear (N) fraction of actin in **(a)** MEF, ESC and iPSC, and **(b)** Hematopoietic progenitors undergoing reprogramming, sampled at daily intervals for 5 days. Withdrawal denotes cells 3 days after Dox removal. Nucleolin and Gapdh control for nuclear and cytoplasmic proteins, respectively. **c** Retroviral constructs for expressing NLS-actin, WT actin and the empty vector (EV) control. **d** Immunofluorescence (IF) of FLAG in MEFs transduced with constructs shown in **c**. **e** Representative western blot analysis validating FLAG-tagged actin in the nuclear fraction of MEFs transduced with constructs shown in **c**. Sun2 and β-tubulin control for nuclear and cytoplasmic proteins, respectively. The numbers denote the ratio between nuclear and cytoplasmic actin band intensity. **f-h**: Reprogrammable MEFs transduced with various actin constructs were selected/sorted (4000 cells), and plated on feeders for reprogramming. **(f)** Representative images of Alkaline Phosphatase positive (AP+) colonies on reprogramming day 10. **(g)** Quantification of AP+ colonies, \*\*\*P < 0.001, n=3. **(h)**. Quantification of Oct4:GFP+ colonies as in **g**. \*\*\*P < 0.001, n=3. **i-l** Reprogramming were conducted without feeders. **(i)** Representative images of bright field and Oct4:GFP overlay on day 15 **(j)** Oct4:GFP FACS histogram on day 10 and 18. **(k)** Mean fluorescence intensity (MFI) of Oct4:GFP on day 10. **(l)** %Oct4:GFP+ on day 18.

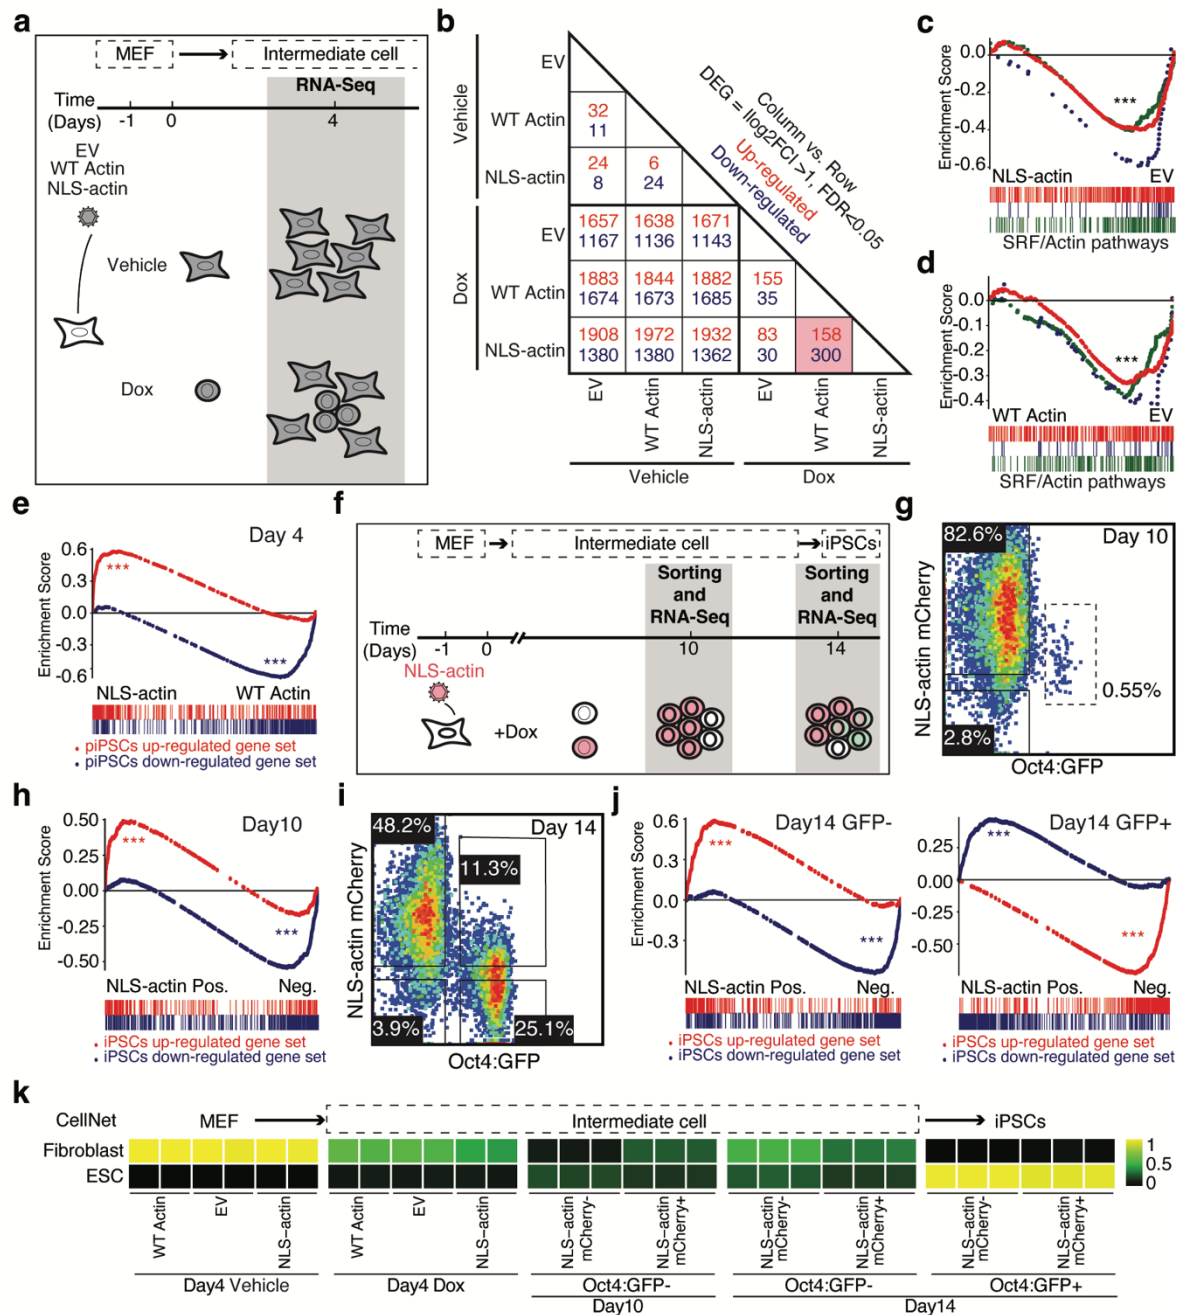

**Fig. 2. NLS-actin promotes somatic cell reprogramming defying known mechanisms.** **a** Experimental workflow for harvesting cells in RNA-seq analysis. Reprogrammable MEF transduced with EV, WT actin or NLS-actin were cultured in Vehicle or Dox for 4 days before total RNA was harvested. **b** Differentially expressed genes (DEGs) in pair-wise comparisons across all sample groups. **c, d** Gene set enrichment analysis (GSEA) detected decreased SRF target genes in **(c)** NLS-actin and **(d)** WT actin expressing cells as compared to EV. Three SRF target gene sets (green, red, blue lines) showed consistent results  $***P < 0.001$ . **e** GSEA enrichment of up-(red) and down-(blue) regulated gene sets in pre-iPSC (piPSC), in day 4 NLS-actin versus WT actin expressing cells.  $***P < 0.001$ . **f** Experimental scheme for comparing cells within the same culture, distinguishable by mCherry. **g** FACS plot of day 10 reprogramming cells which contain a small population (0.55%) of Oct4:GFP+ cells, with the majority being mCherry+. **h** GSEA enrichment of up-(red) and down-(blue) regulated gene sets in iPSCs, in day 10 Oct4:GFP- cells, between the NLS-actin mCherry positive (Pos.) and negative (Neg.) populations in **g**.  $***P < 0.001$ . **i** FACS plot of day 14 reprogramming cells. Four populations distinguishable by mCherry and Oct4:GFP were sorted for RNA-Seq. **j** GSEA enrichment of up-(red) and down-(blue) regulated gene sets in iPSCs, in day 14 cells between the NLS-actin mCherry positive (Pos.) and negative (Neg.) populations from Oct4:GFP- (left) and Oct4:GFP+ (right) groups in **i**.  $***P < 0.001$ . **k** CellNet analysis of all samples over time. Bright yellow denotes high similarity and black denotes dissimilarity to reference cell types MEF and ESC.

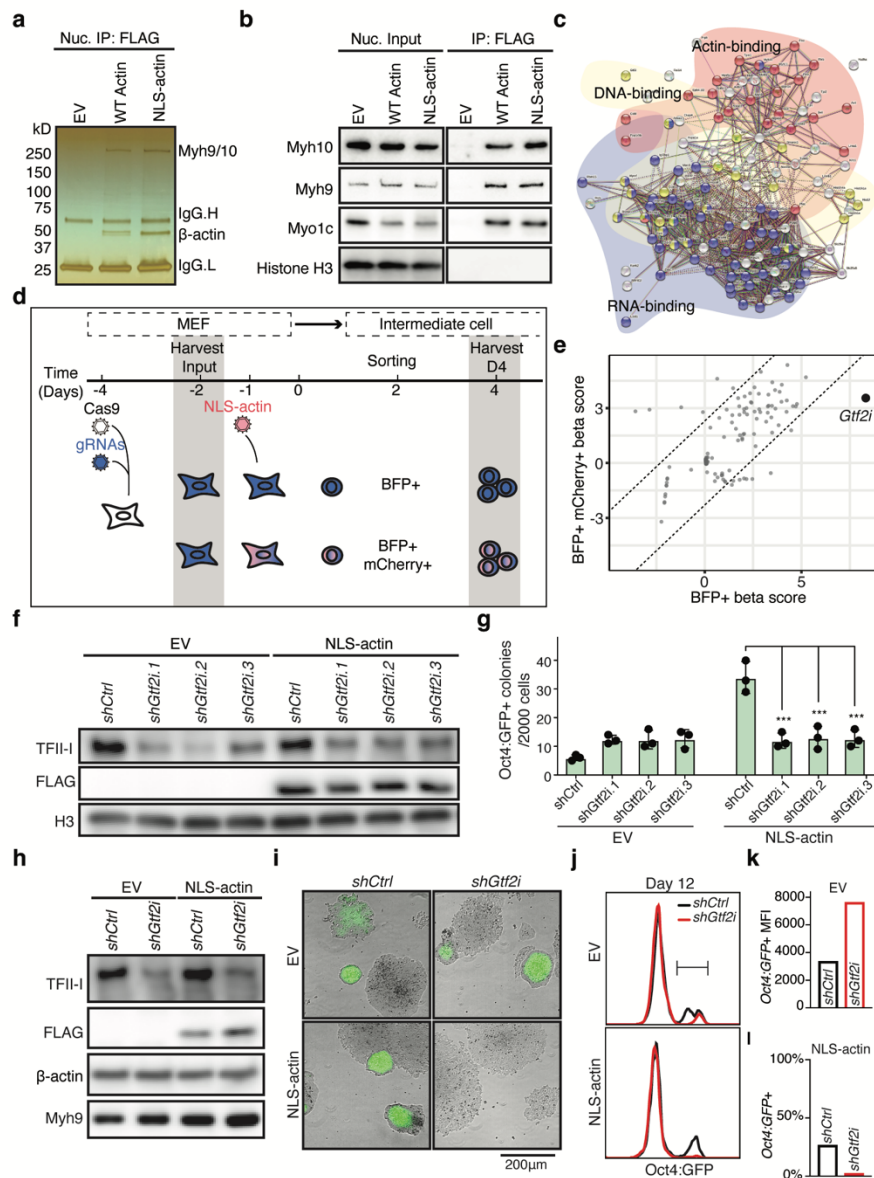

**Fig. 3. *Gtf2i*/TFII-I is required for NLS-actin to promote reprogramming.** **a,b,c** Co-immunoprecipitation followed by mass spectrometry for identifying nuclear actin interacting proteins. **(a)** SDS-PAGE and silver staining of the nuclear protein immunoprecipitants by FLAG antibody on day 6 reprogramming MEFs. **(b)** Western blot with antibodies specific for Myh9, Myh10 and Myo1c on the immunoprecipitated protein, with Histone H3 as a control. **(c)** STRING analysis of 122 candidate nuclear actin interacting proteins containing three categories: actin binding proteins (pink), DNA binding proteins (yellow) and RNA binding proteins (blue). **d,e** CRISPR screen identifying mediator(s) of nuclear actin to promote reprogramming. **(d)** Experimental scheme of the screen. Custom gRNAs library targeting the 122 candidate genes and 10 additional control genes (4 gRNAs per gene) were constructed, which also co-express Blue Fluorescence Protein (BFP). Cas9-expressing vector (also expresses blasticidin resistance) were transduced into reprogrammable MEFs and selected by blasticidin. Input DNA was collected before NLS-actin (mCherry+) transduction and Dox treatment. BFP+ cells were sorted into mCherry+/- population and continued reprogramming. On reprogramming day 4, DNA from enough BFP+ and BFP+/mCherry+ cells were collected to provide ~150x coverage. **(e)** Normalized beta score of BFP+ and BFP+mCherry+ gRNA reads against input. gRNAs targeting *Gtf2i* are depleted in BFP+mCherry+ cells. **f** Western blot analysis for TFII-I protein in MEFs transduced with EV or NLS-actin, expressing individual shRNAs targeting *Gtf2i*, using Histone H3 as a loading control. **g** Quantification of Oct4:GFP+ colonies on day 10, from cells shown in f. n=3. **h** Western blot analysis for TFII-I protein in MEFs expressing EV or NLS-actin expressing the three pooled *Gtf2i* shRNAs, with Myh9 as a loading control. **i** Representative bright field and Oct4:GFP images on day 15 from cells in h. **j** FACS histogram of Oct4:GFP on day 12. **k** Quantification of the mean fluorescence intensity (MFI) of Oct4:GFP in EV cells. **l** %Oct4:GFP+ on day 12 in NLS-actin expressing cells. MFI was not quantified in these cells due to their absence.

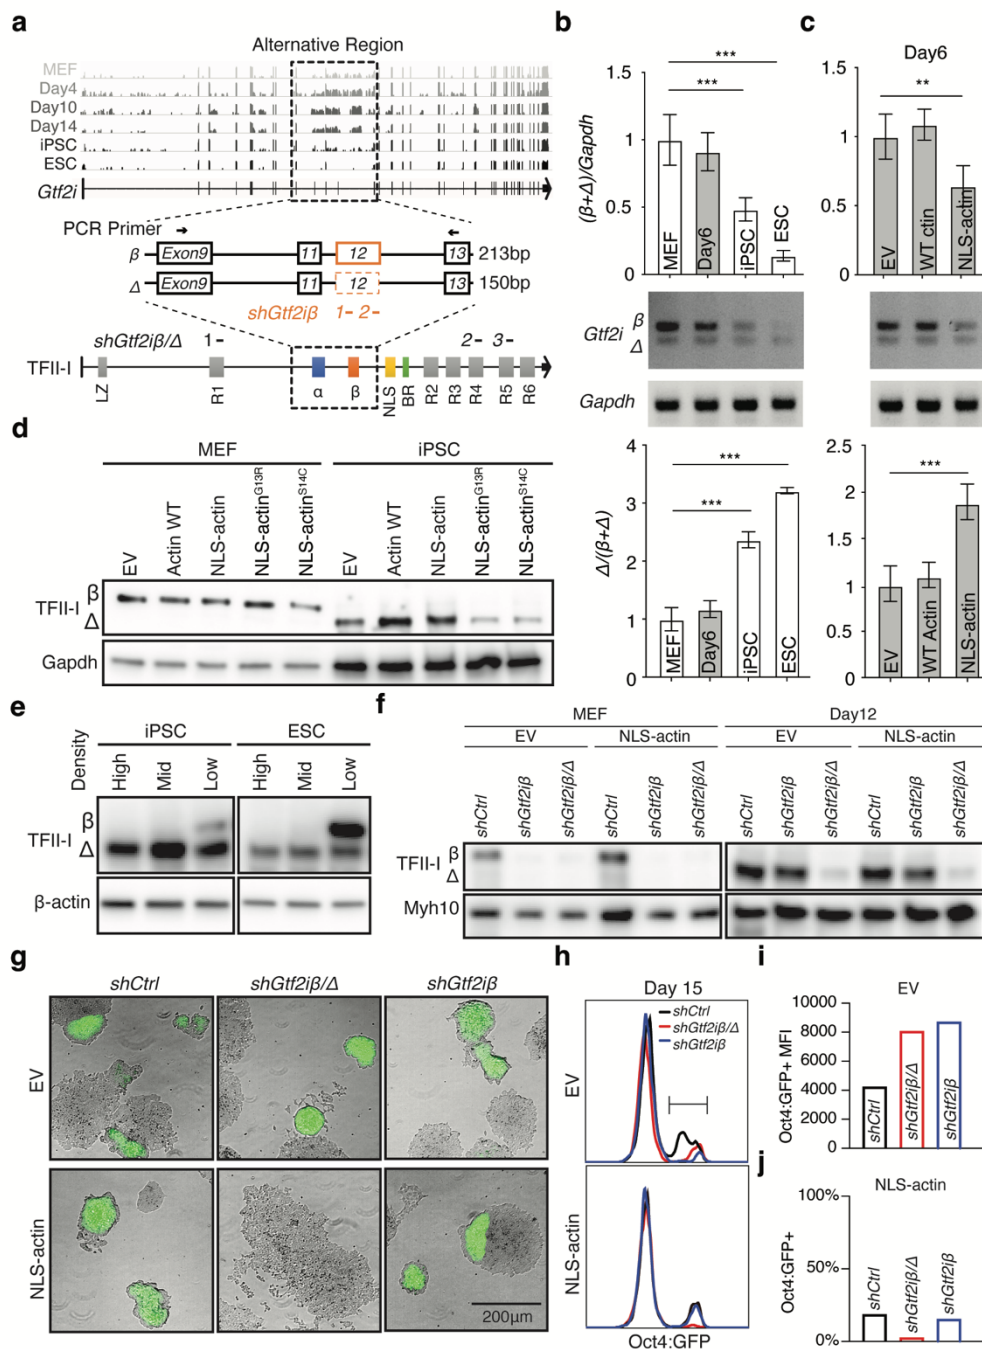

**Fig. 4 The delta isoform of *Gtf2i*, TFII-IA, mediates NLS-actin's pro-reprogramming effect.** **a** Top: RNA-seq reads during reprogramming mapping to the *Gtf2i* gene. Box depicts the region of alternative exons. Middle: Schematic of the alternative exons, highlighting the difference between  $\beta$  and  $\Delta$  isoforms. Exon 12 (orange box) is present in  $\beta$  and absent in  $\Delta$ . The black arrows above the exons denote positions of qPCR primers, with the anticipated PCR amplicon sizes in base pairs (bp). Bottom: Schematic of TFII-I protein isoforms. The shRNAs used in Fig. 3 are shown as three short black bars, with the  $\beta$  specific shRNAs shown as two orange bars. **b** RT-qPCR products using primers shown in **a** from different cell types. The PCR products contain two bands, corresponding to the  $\beta$  and  $\Delta$  isoforms. Quantification of the total product level normalized to *Gapdh* is shown on top and the  $\Delta/(\beta+\Delta)$  ratio below. **c** Similar to **b**, qPCR products from reprogramming day 6 cells expressing the indicated constructs. **d** Western blot analysis of TFII-I protein in MEFs expressing the actin constructs and the iPSC derived from the respective MEFs, with *Gapdh* as a loading control. **e** Western blot analysis of TFII-I protein in iPSC and ESC plated at different densities. **f** Western blot for TFII-I in reprogrammable MEFs transduced with  $\beta$ -specific or  $\beta/\Delta$  dual targeting shRNAs. Extracts were harvested from MEFs before reprogramming and on day 12, with *Myh10* as a loading control. **g** Representative bright field and Oct4:GFP fluorescence of reprogramming cultures on day 15. **h** Oct4:GFP analysis by FACS for cells shown in **g**. **i** MFI of Oct4:GFP in EV cells. **j** %Oct4:GFP+ in NLS-actin expressing cells. Note the absence of Oct4:GFP+ cells with  $\beta/\Delta$  dual targeting shRNAs.

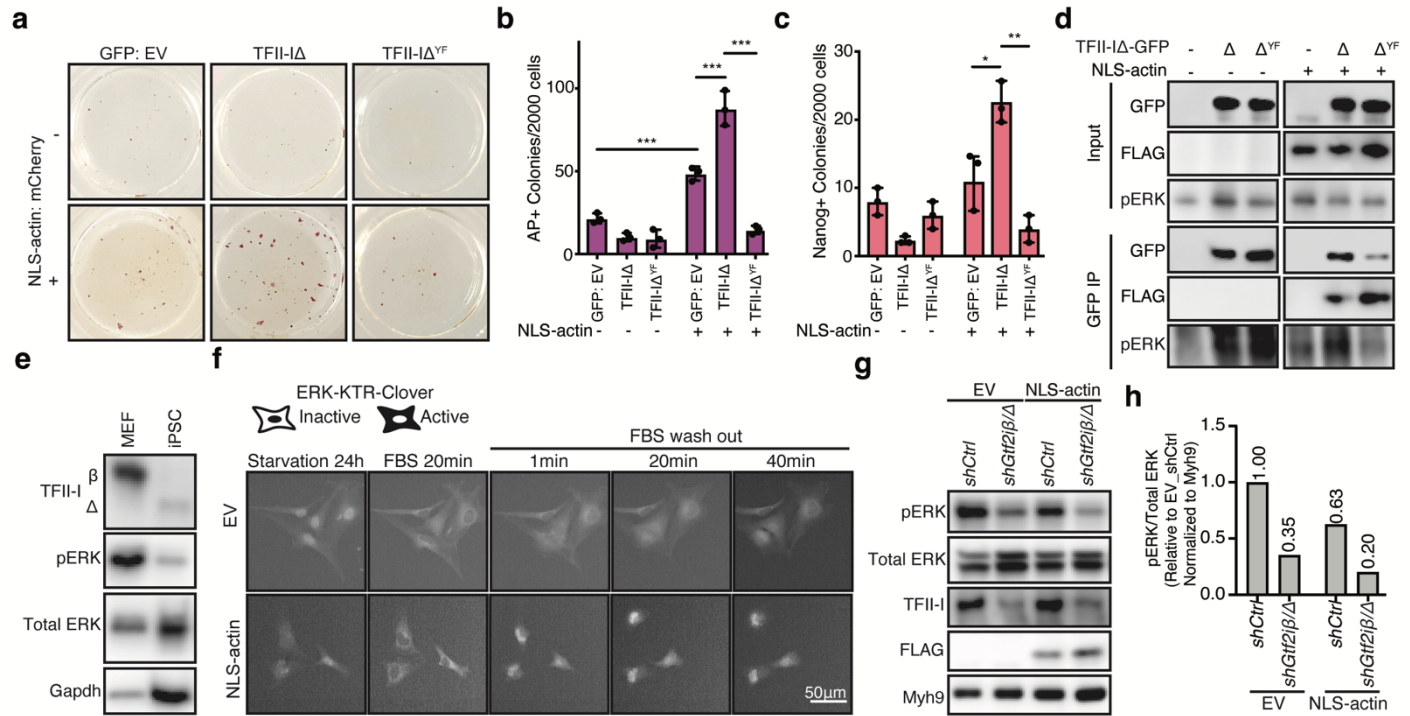

**Fig. 5. Inhibiting TFII-Δ while co-expressing NLS-actin reduces pERK to a level not permissive for reprogramming.** **a** Representative AP<sup>+</sup> colonies formed by cells overexpressing WT TFII-Δ or the Y248F (YF) mutant on day 10. **b** Quantification of AP<sup>+</sup> colonies shown in a. n=3. **c** Cultures shown in a were stained by Nanog specific antibody (since the TFII-Δ constructs co-express GFP) and quantified. n=3. **d** Western blot analyses for FLAG and pERK following co-IP with GFP antibody in cells transduced with EV, WT or YF TFII-I, with or without NLS-actin co-expression. **e** Western blot for TFII-I and pERK in MEF and iPSC, with total ERK and Gapdh as controls. **f** Time-lapse images of ERK-KTR-Clover in EV or NLS-actin expressing fibroblasts, serum starved for 24 hours before stimulated for imaging. **g** Western blot for pERK levels in EV or NLS-actin expressing MEFs in the presence of β/Δ dual targeting shRNAs, with Myh9 as a loading control. **h** Quantification of pERK/ERK ratio normalized to Myh9 shown in g.

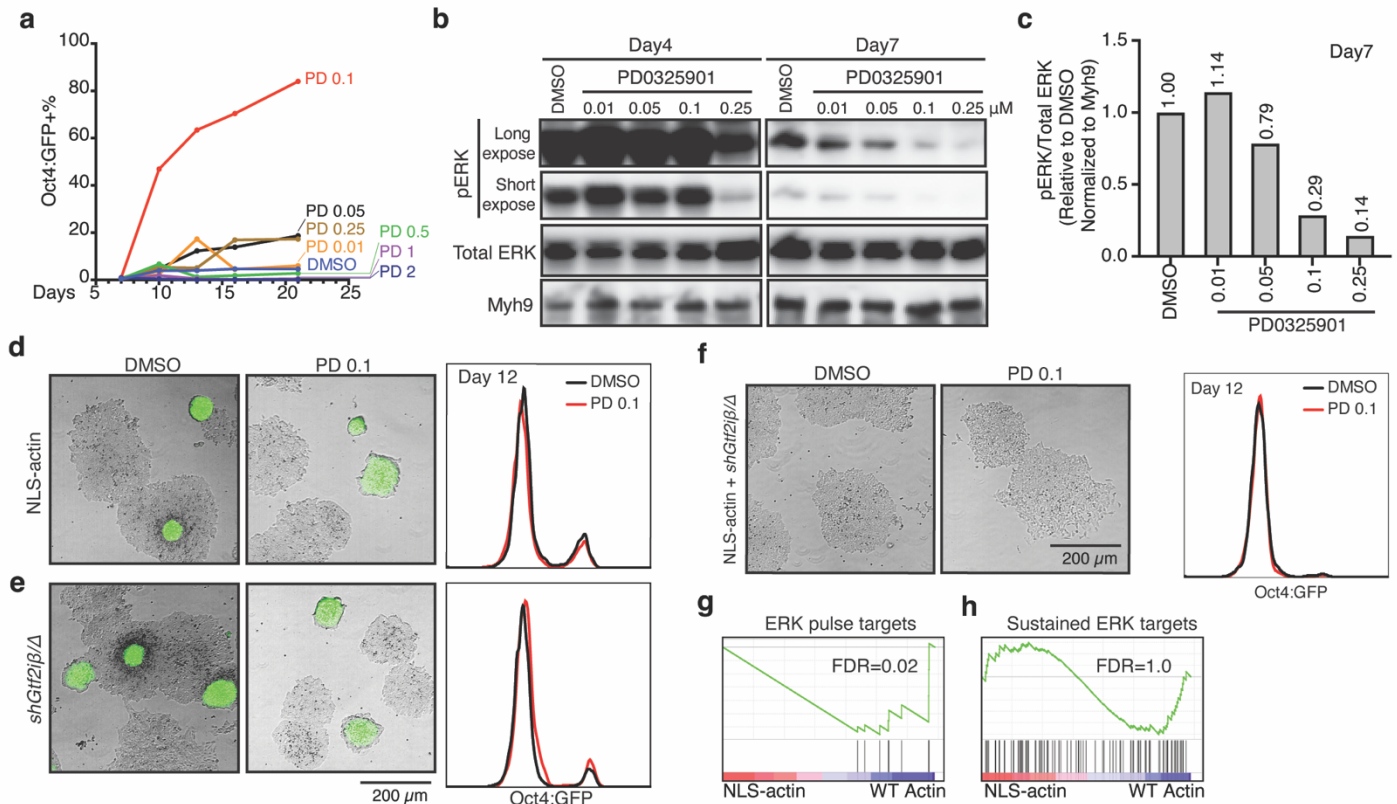

**Fig. 6. Mild ERK inhibition by chemical inhibitors promotes reprogramming from most fibroblasts.** **a** %Oct4:GFP+ cells arising in reprogramming cultures treated with different concentrations of PD0325901 over time (days), as determined by FACS. **b** Western blot analysis for pERK and total ERK in the presence of various PD0325901 concentrations, harvested on day 4 and 7. **c** Quantification of the pERK/ERK ratio, normalized to Myh9 on day 7 as shown in **b**. **d-f** Representative bright field and Oct4:GFP fluorescence and their corresponding FACS plots in 0.1μM PD0325901 (PD 0.1) on day 15 in cells expressing NLS-actin (**d**) or pooled β/Δ targeting shRNAs (**e**), or both (**f**). **g** A subset of ERK targets, defined as the “ERK pulse targets” is downregulated by NLS-actin as compared to cells expressing WT actin in the same RNA-seq results shown in Fig. 2b. **h** Most other ERK target genes, defined as the “Sustained ERK targets” show no difference.

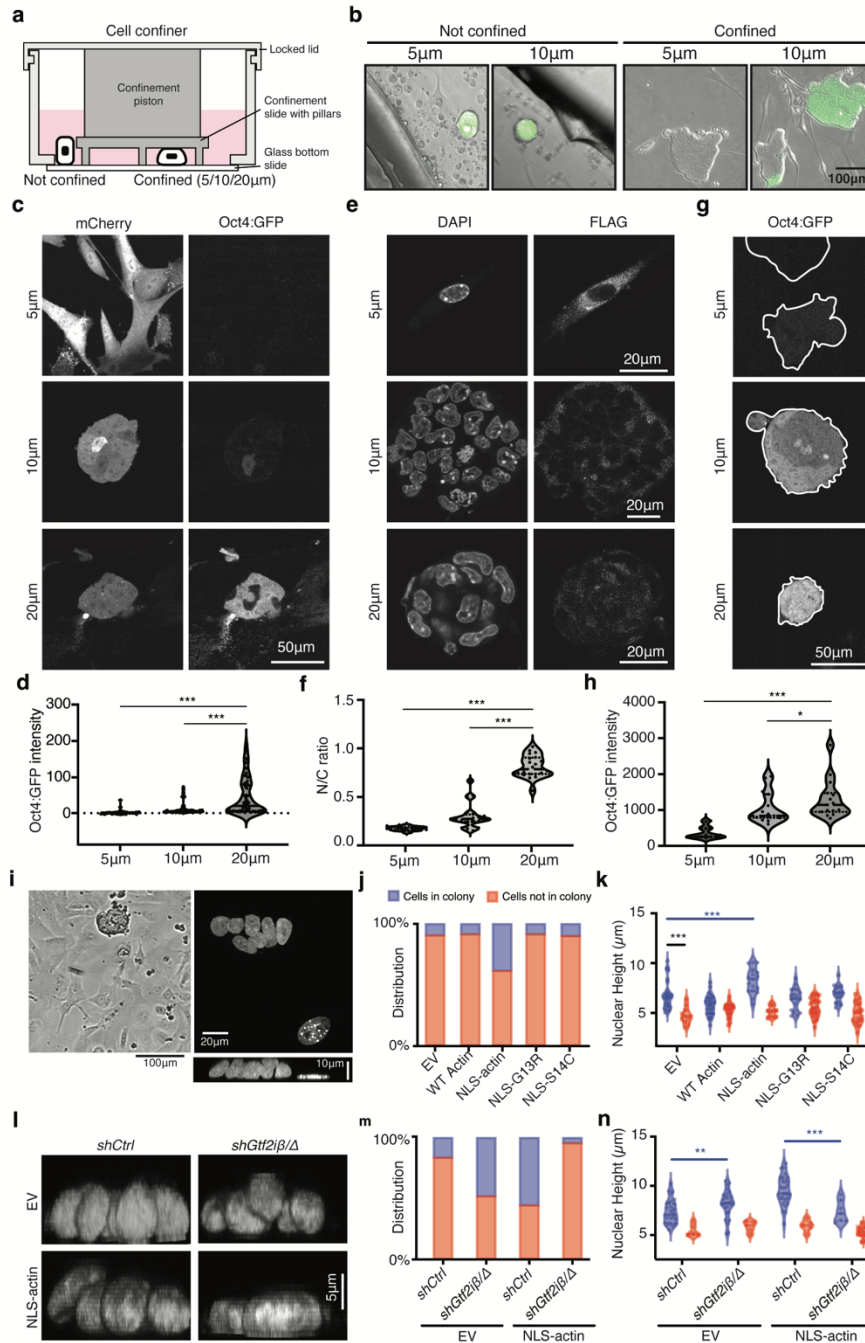

**Fig. 7 Actin fails to accumulate in the nucleus below a threshold nuclear height.** **a** Schematic of the cell height confiner, depicting height-confined cells and unconfined cells outside of the confinement area. **b** Representative bright field and Oct4:GFP fluorescence of cells and colonies under 5 or 10  $\mu$ m confinement on reprogramming day 14. Cells outside of the confinement area are shown as controls. **c** NLS-actin expressing cells on day 12 under different height confinement. **d** Quantification of Oct4:GFP fluorescence intensity of cells in c, \*\*\* $p$  < 0.001,  $n$ =50. **e** FLAG IF on cells similar to those in c. **f** Quantification of the nuclear:cytoplasmic (N:C) FLAG signals for cells in e, \*\*\* $p$  < 0.001,  $n$ =20. **g** Oct4:GFP+ ESC under height confinement. **h** Quantification of Oct4:GFP fluorescence intensity of cells in g. Solid white line marks the boundary of colonies.  $n$ =15. \* $p$  < 0.05, \*\*\* $p$  < 0.001. **i** Representative images showing two typical types of cells on day 6-8 of MEF reprogramming. Left (low power bright field): a small colony surrounded by fibroblast-like cells. Right (high power with side/z-view): DAPI stained cells imaged by confocal microscopy depicting a small cluster of cells and one lone cell on the side. **j** Numeric frequency of the two types of cells expressing the indicated actin constructs on day 6 of reprogramming. **k** Quantification of nuclear height of the two types of cells in j.  $n$  = 11-35. \*\*\* $p$  < 0.001. **l** Representative z-view of DAPI stained reprogramming culture on day 6, from cells expressing EV or NLS-actin in combination with  $\beta/\Delta$  dual targeting shRNAs. **m** Numeric frequency of the two types of cells in l. **n** Quantification of nuclear height of the two types of cells in l.  $n$  = 5-31. \*\* $p$  < 0.01. \*\*\* $p$  < 0.001.



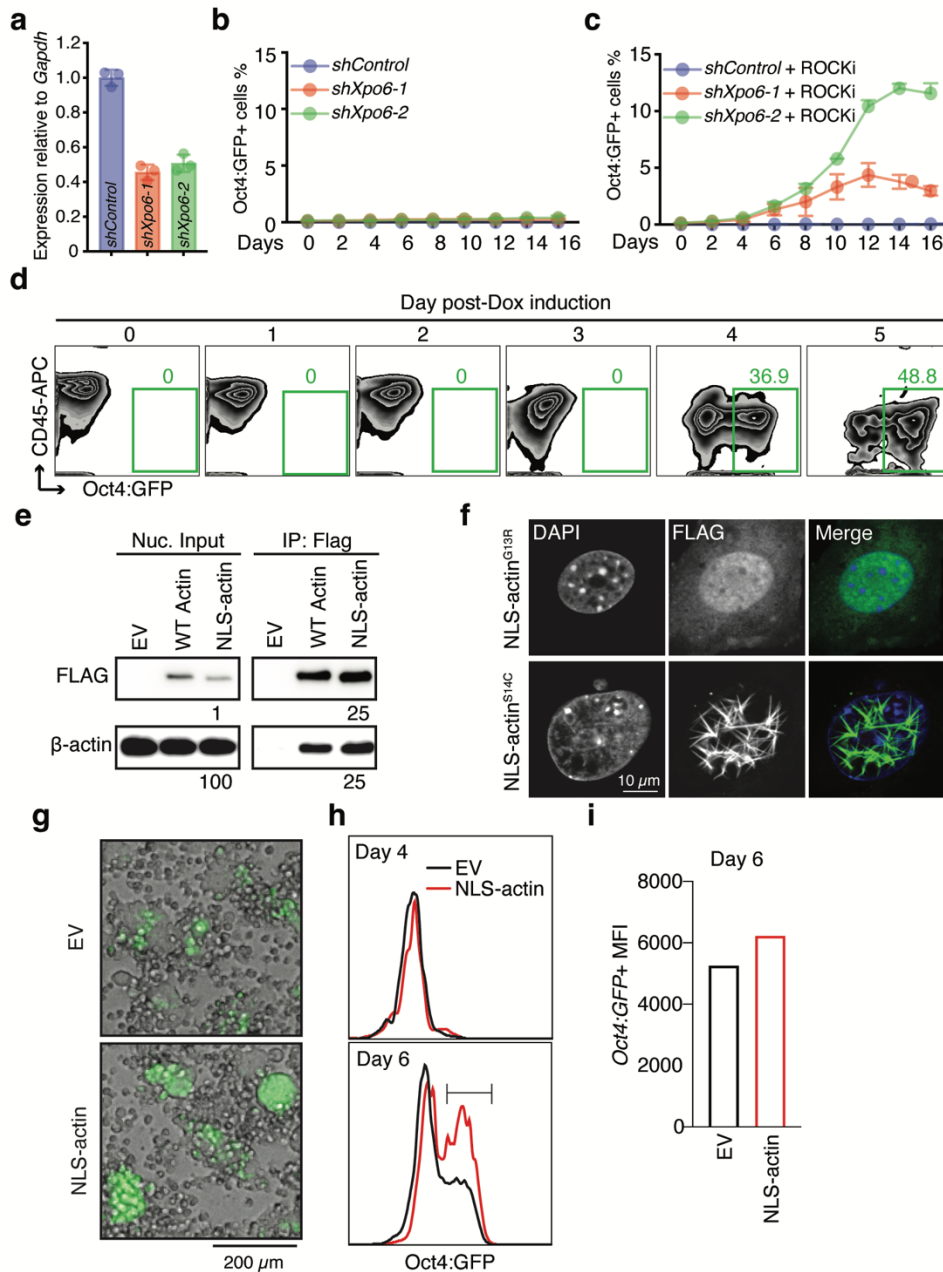

**Fig. S1. More actin in the nucleus favors pluripotency.** **a** Realtime RT-qPCR analysis of *Xpo6* in caMKL1-blocked cells, transduced with shRNAs targeting *Xpo6* or control shRNA (shControl), normalized to *Gapdh*.  $n=3$ . **b,c** caMKL1-blocked cells were rescued by *Xpo6* shRNAs in the absence (**b**) or presence (**c**) of ROCK inhibitor (ROCKi), as determined by the emergence of Oct4:GFP+ cells. The rescue efficiency is similar to what was reported for members of the actomyosin-LINC system. **d** Representative FACS plots showing %Oct4:GFP+ cells in reprogramming hematopoietic progenitors, sampled at daily intervals. CD45 marks all hematopoietic cells. The same conditions were used for protein fractionation as shown in Fig.1b. **e** Assessing endogenous and exogenous nuclear actin by relative band intensity. Immunoprecipitation with FLAG antibody followed by western blot showed 25-fold enrichment; however, the pull-down only accounts for about a quarter of the nuclear input, suggesting overexpression to be ~1% of that of the endogenous  $\beta$ -actin. **f** FLAG IF in MEFs transduced with polymerization defective mutant NLS-actin<sup>G13R</sup> or depolymerization defective mutant NLS-actin<sup>S14C</sup>. Similar to Fig. 1d. **g-i** Hematopoietic progenitors were transduced with EV or NLS-actin constructs and induce by Dox for reprogramming. **(g)** Representative images of bright field and Oct4:GFP overlay on day 5. **(h)** Oct4:GFP histogram on day 4 and day 6. **(i)** MFI of Oct4:GFP on day 6.

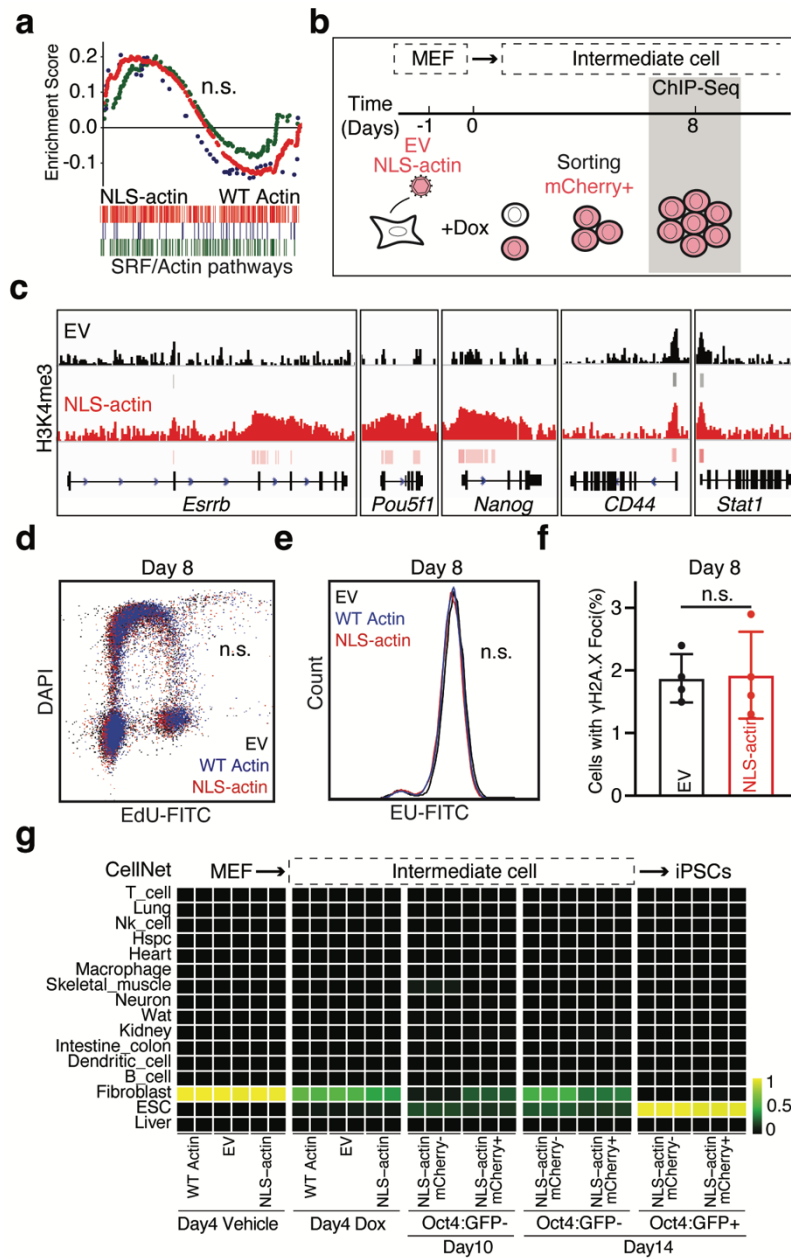

**Fig. S2. NLS-actin promotes somatic cell reprogramming defying known mechanisms.** **a** GSEA detected no difference in SRF target genes between cells expressing WT actin and NLS-actin. n.s.: non-significant. **b** Experimental scheme for cell harvesting for H3K4me3 ChIP-seq on day 8. **c** H3K4me3 binding at three representative pluripotency genes, *Esrrb*, *Pou5f1* and *Nanog*, and two fibroblast genes, *CD44* and *Stat1*. **d** Representative FACS plots of EdU labeling newly synthesized DNA, with DAPI staining all DNA. **e** Representative FACS plots of EU staining newly transcribed RNA. **f** Quantification of  $\gamma$ H2AX foci in EV and NLS-actin transduced reprogrammable MEFs on day 8. For d-f, all experiments were performed in biological triplicates or quadruplicates and no difference was detected. **g** Full CellNet analysis with more reference cell types as in Fig. 2k.

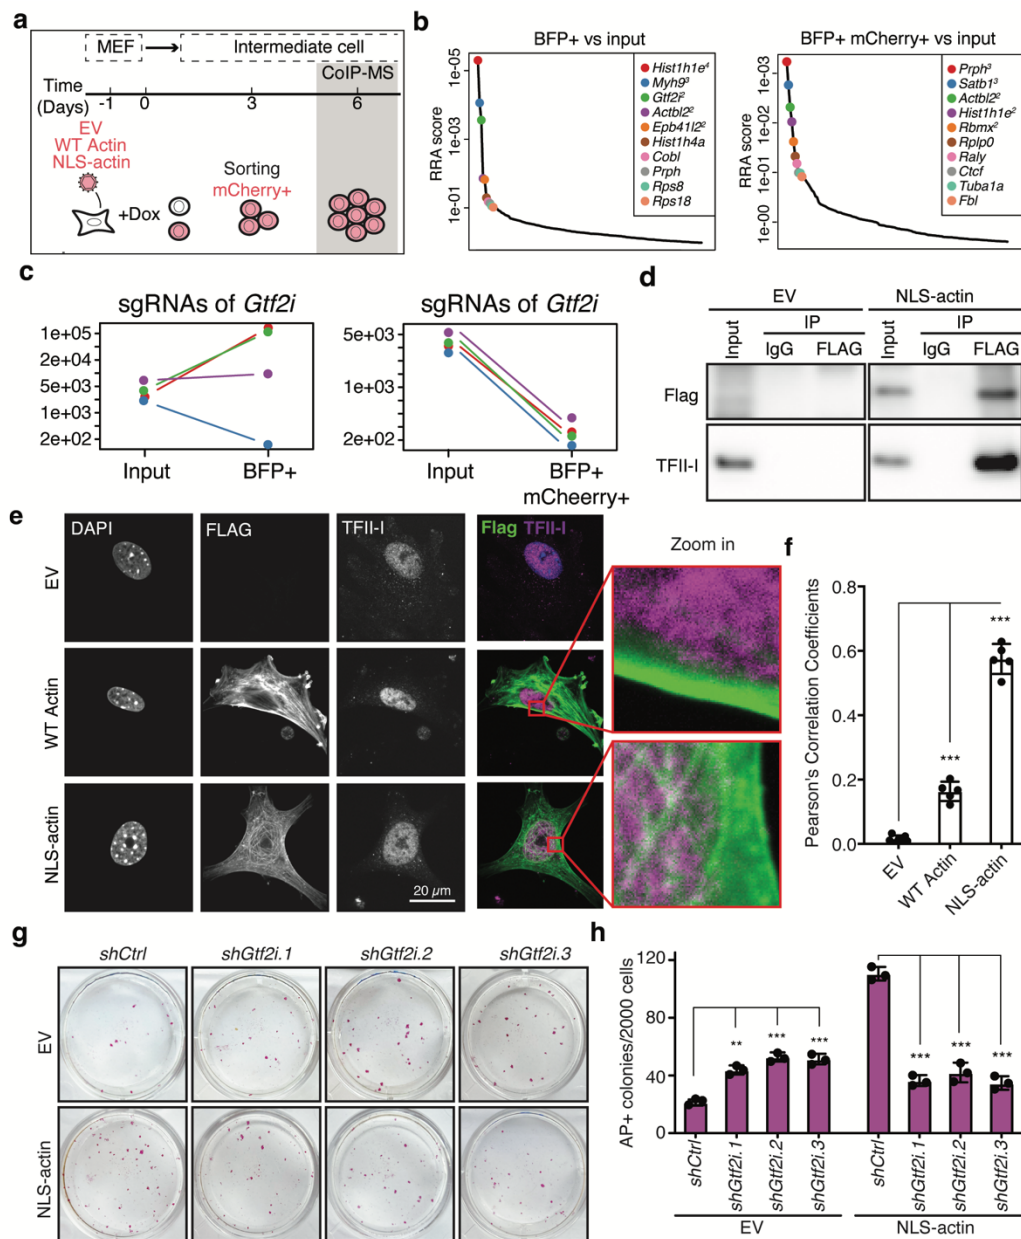

**Fig. S3. *Gtf2i*/TFII-I is required for NLS-actin to promote reprogramming.** **a** Experimental scheme for harvesting proteins for co-IP followed by mass spectrometry. Reprogrammable MEF expressing EV, WT actin or NLS-actin were reprogrammed for 6 days. Nuclear protein fractions from mCherry+ cells were precipitated by FLAG antibody. **b** FluteRRA (robust ranking aggregation, RRA) analysis of gRNA reads, related to Fig. 3d-e. The top 10 genes with the most gRNA counts in BFP+ cells (left) or BFP+/mCherry+ cells (right) relative to input. **c** Absolute reads number of the four individual gRNAs targeting *Gtf2i* in BFP+ cells (left) or BFP+/mCherry+ cells (right). **d** FLAG antibody pulled down endogenous TFII-I in NLS-actin but not in EV control cells. **e** Representative IF images of FLAG and TFII-I. Inset: zoom in regions across a nuclear boundary region. **f** Quantification of FLAG and TFII-I signal colocalization by Pearson correlation. n=5, \*\*\*p < 0.001. **g** Representative AP+ colonies on day 10 from EV or NLS-actin expressing cells with three individual shRNAs targeting *Gtf2i*. **h** Quantification of AP+ colonies in g, n=3, \*\*\*p < 0.001.

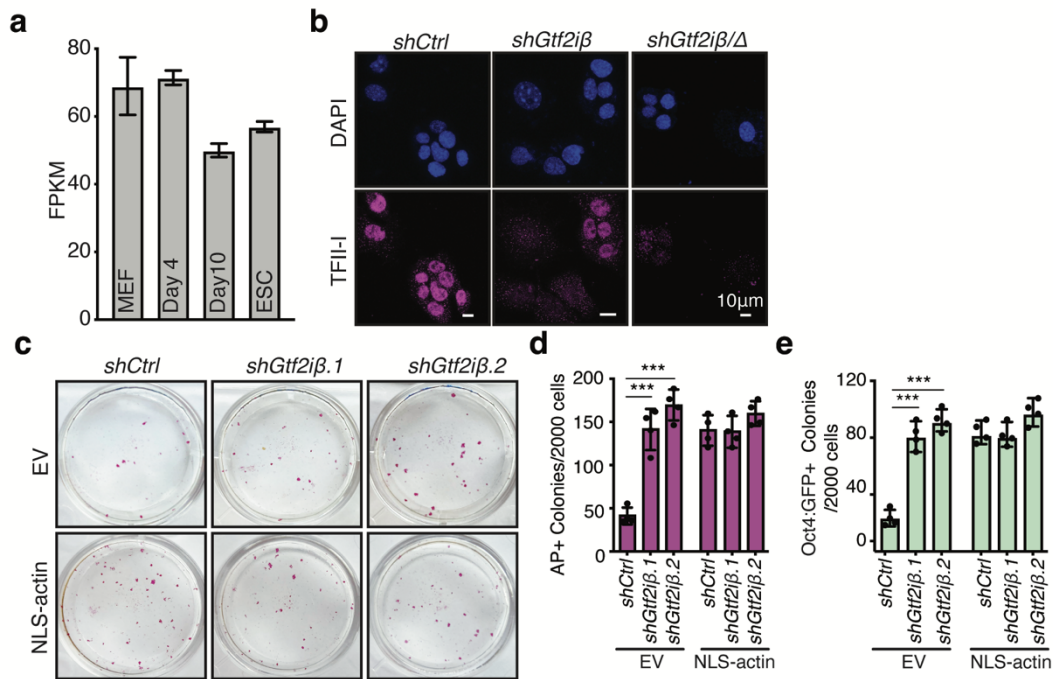

**Fig. S4 The delta isoform of Gtf2i, TFII-1 $\Delta$ , mediates NLS-actin's pro-reprogramming effect.** **a** Total FPKM mapping to *Gtf2i* in various cell types. **b** IF staining of TFII-1 in day 7 reprogramming cultures in the presence of shRNAs. **c** Representative AP<sup>+</sup> colonies formed in EV or NLS-actin expressing cells in the presence of  $\beta$ -specific or  $\beta/\Delta$  dual targeting shRNAs on day 10. **d** Quantification of AP<sup>+</sup> colonies shown in c. n=4. **e** Quantification of Oct4:GFP<sup>+</sup> colonies shown in c. n=4.

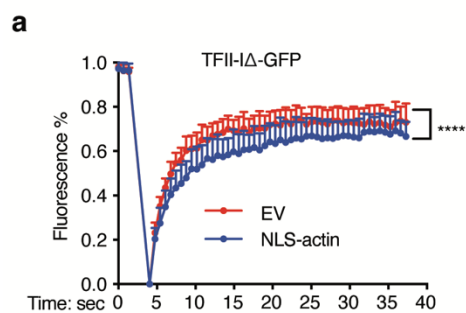

**Fig. S5. Mobility of TFII-1A is reduced by NLS-actin expression.** a FRAP analysis of TFII-I-Δ-GFP in cells expressing EV or NLS-actin. n=20 each.

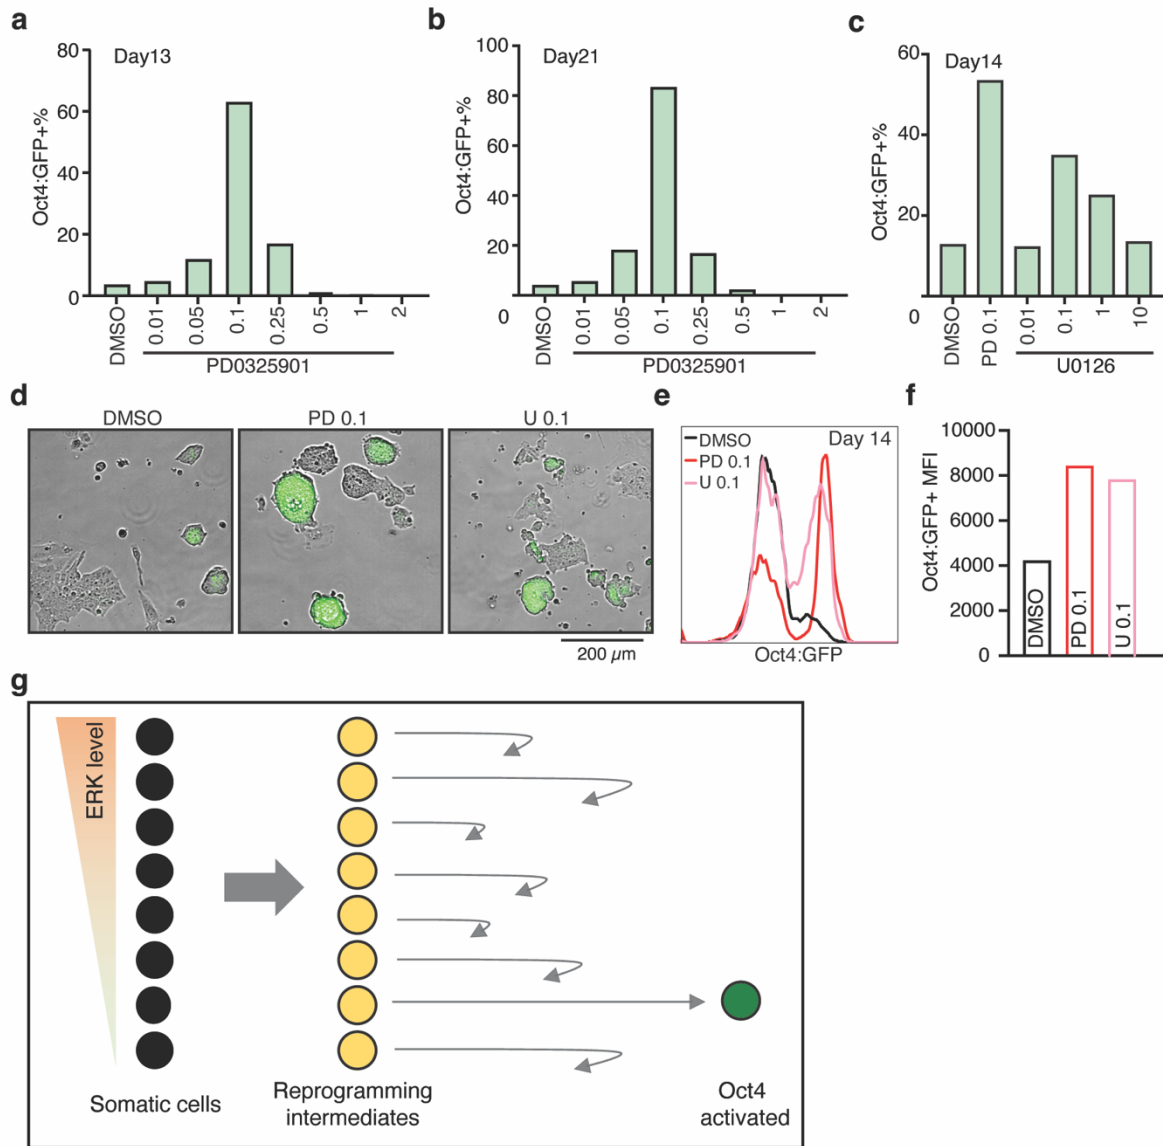

**Fig. S6. Mild ERK inhibition by chemical inhibitors promotes reprogramming from most fibroblasts.** **a** %Oct4:GFP+ cells in reprogramming cultures treated with different concentrations of PD0325901 on day 13, as shown in Fig. 6a. **b** %Oct4:GFP+ on day 21, as shown in Fig. 6a. **c** %Oct4:GFP+ in reprogramming cultures treated with different concentrations of U0126 on day 14, with 0.1 μM PD0325901 as a positive control. **d** Representative bright field and Oct4:GFP fluorescence images on day 15, in the presence of 0.1 μM PD0325901 or U0126, as compared to DMSO. **e** Oct4:GFP FACS for cells in d on day 14. **f** Oct4:GFP MFI for cells in e. **g** Model depicting the apparent low reprogramming efficiency as gated by a low and narrow ERK activity range.

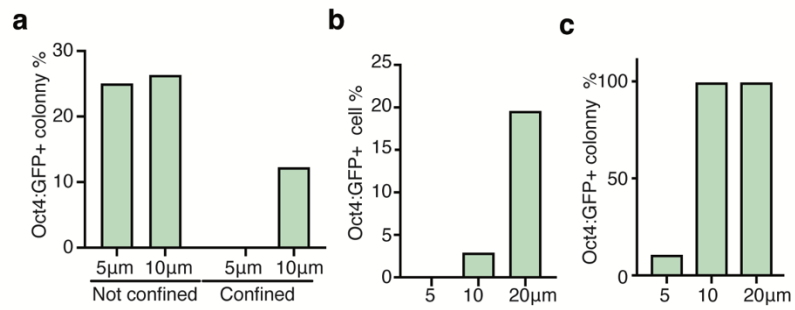

**Fig. S7 Actin fails to accumulate in the nucleus below a threshold nuclear height. a** Quantification of %Oct4:GFP+ colonies under 5 or 10 μm confinement, as shown in Fig. 7b. **b** Quantification of %Oct4:GFP+ cells under 5, 10 or 20 μm confinement, as shown in Fig. 7c. **c** Quantification of %Oct4:GFP+ ESC colonies under 5, 10 or 20 μm confinement, as shown in Fig. 7g.

## Supplemental tables and movies

Supplementary Table 1: FPKM of all genes by RNA-seq and differentially expressed genes (DEGs) in pair-wise comparisons.

Supplementary Table 2: GO molecular function enrichment for the up- and down-regulated DEGs between cells expressing WT actin and NLS-actin on day 4 of reprogramming.

Supplementary Table 3: Annotated protein interactome of nuclear actin.

Supplementary Table 4: The NAIT library screen.

Supplementary Table 5: List of primers, shRNAs and antibodies

### **Movie S1. Z-stack of FLAG tagged NLS-actin, related to Fig.1d.**

Images were acquired on Leica SP5 microscope at 63x, zoom in 8-fold. The movie is played from cell bottom to top at 0.38  $\mu\text{m}$  steps. A total of 26 z-planes were acquired. Total z-depth is 9.44  $\mu\text{m}$ .

### **Movie S2. Z-stack of FLAG tagged NLS-actin<sup>G13R</sup>, related to Fig.S1f.**

Images were acquired on Leica SP5 microscope at 63x, zoom in 8-fold. The movie is played from cell bottom to top at 0.38  $\mu\text{m}$  steps. A total of 15 z-planes were acquired. Total z-depth is 5.29  $\mu\text{m}$ .

### **Movie S3. Z-stack of FLAG tagged NLS-actin<sup>S14C</sup>, related to Fig.S1f.**

Images were acquired on Leica SP5 microscope at 63x, zoom in 8-fold. The movie is played from cell bottom to top at 0.38  $\mu\text{m}$  steps. A total of 17 z-planes were acquired, Total z-depth is 6.04  $\mu\text{m}$ .

### **Movie S4. Z-stack of DAPI stained reprogramming culture on day 7, related to Fig 7i.**

A representative cell cluster and a fibroblast-like cell in the same field of view. Images were acquired on Leica SP5 microscope at 63x, zoomed in 2-fold. A total of 19 z-planes were acquired, at 1  $\mu\text{m}$  steps. Total z-depth is 18.13  $\mu\text{m}$ .
